# Supplementary material
Source: publisher figshare collection journal article supplement (https://geolsoc.figshare.com/ndownloader/files/26673994)
Supplement: Supplementary file 1 [file 26673994]

## Sheet: UN-12-3
Analysis	207Pb/235U	2SE	206Pb/238U	2SE	ρ	207Pb/235U age (Ma)	2SE	206Pb/238U age (Ma)	2SE	207Pb/206Pb (Ma)	2SE	Concordia age (Ma)	2SE	p-value	Th/U	Disc (%)	Selected age for KDE
03R1.2	19.32	0.6	0.602	0.019	0.76002	3057.9	15.1	3037.9	38.3	3071.1	17.7	3063.1	13.3	0.48	0.59366	1.08105	3071.1
03R1.7	11.97	0.28	0.4649	0.011	0.58529	2602.1	11.1	2461.2	24.2	2713.6	18	2614.2	11	1e-12	0.866752	9.3013	2713.6
03R2.1	3.98	0.094	0.2789	0.0062	0.28267	1630.13	9.65	1585.8	15.6	1687.8	25.5	1621.14	9.21	0.0053	1.14728	6.04337	1687.8
03R2.2	0.616	0.014	0.0774	0.0017	0.30843	487.34	4.41	480.58	5.09	519.2	28.9	484.65	3.81	0.23	0.761427	7.43837	480.58
03R2.3(1)	0.609	0.019	0.0765	0.0018	0.39616	482.93	6	475.2	5.4	519.8	33.8	478.36	4.75	0.22	0.461656	8.58022	475.2
03R2.4	6.81	0.13	0.3646	0.0084	0.45857	2087.02	8.57	2003.9	19.9	2170	19.6	2088.26	8.61	2.4e-06	0.62616	7.65438	2170
03R2.6	12.08	0.24	0.4812	0.011	0.62689	2610.64	9.48	2532.5	24	2671.8	15.8	2621.5	9.09	6.1e-05	0.165269	5.21371	2671.8
03R2.8	13.61	0.32	0.5049	0.012	0.64981	2723	11.3	2634.8	25.7	2789	16.6	2736.2	10.9	1.4e-05	0.490993	5.52886	2789
03R2.9	3.91	0.1	0.2708	0.0059	0.27099	1615.8	10.4	1544.9	15	1709.4	26.6	1596.2	9.73	6.9e-06	0.787585	9.62326	1709.4
03R2.10	10.48	0.25	0.4369	0.0099	0.62417	2478.2	11.2	2336.7	22.2	2596.2	17.2	2491.8	11.1	6.7e-16	0.742626	9.99538	2596.2
03R3.1(1)	0.598	0.025	0.0759	0.002	0.15536	475.96	7.95	471.6	6	497	50.5	473.07	5.13	0.64	0.372283	5.11066	471.6
03R3.3	3.008	0.088	0.2361	0.0055	0.3176	1409.6	11.2	1366.4	14.4	1475.7	29.6	1395.3	10.2	0.0044	0.43427	7.40665	1475.7
03R3.4	13.66	0.26	0.5092	0.012	0.36409	2726.43	9.19	2653.2	25.7	2781.1	20.2	2726.69	9.22	0.0021	0.317938	4.5989	2781.1
03R3.5	1.66	0.075	0.1626	0.0039	0.069205	993.4	14.3	971.2	10.8	1042.7	50.2	978.92	8.98	0.2	0.39413	6.8572	971.2
03R3.6	12.62	0.28	0.4847	0.011	0.47097	2651.7	10.6	2547.7	23.9	2732.1	19.3	2653.3	10.7	7.6e-07	0.251364	6.74939	2732.1
03R3.7	13	0.29	0.4985	0.011	0.61123	2679.7	10.7	2607.3	23.7	2734.7	16.5	2687.8	10.5	0.00016	0.489348	4.65865	2734.7
03R3.8	0.591	0.023	0.0751	0.0017	0.12448	471.51	7.35	466.81	5.1	494.4	46.9	468.22	4.43	0.58	0.386377	5.5805	466.81
03R3.10	3.191	0.067	0.2481	0.0057	0.60534	1454.98	8.18	1428.7	14.7	1493.6	18.8	1456.18	8.19	0.026	0.812836	4.34521	1493.6
03R4.1	0.613	0.033	0.0768	0.002	0.22198	485.5	10.4	476.99	5.99	525.6	59.6	478.58	5.64	0.43	0.283489	9.24848	476.99
03R4.3	0.583	0.022	0.0746	0.0016	0.16881	466.39	7.06	463.81	4.81	479.1	44.4	464.53	4.27	0.74	0.419025	3.1914	463.81
03R4.5	2.476	0.095	0.216	0.006	0.15383	1265	13.9	1260.7	15.9	1272.4	42.8	1263.2	11.3	0.82	0.345972	0.919522	1272.4
03R4.6	5.2	0.12	0.341	0.0079	0.33532	1852.62	9.91	1891.5	19	1809.3	24.4	1856.48	9.65	0.034	-5.80915e-06	-4.54319	1809.3
03R4.7	4.706	0.092	0.3085	0.007	0.51898	1768.31	8.27	1733.3	17.3	1809.9	19.2	1769.26	8.29	0.018	0.414314	4.23228	1809.9
03R4.8	0.575	0.019	0.0744	0.0017	0.36154	461.24	6.13	462.61	5.11	454.4	36.3	462.12	4.55	0.83	0.487199	-1.80678	462.61
03R4.9	0.626	0.035	0.0783	0.0029	-0.062392	493.6	10.9	485.97	8.67	529.2	75.6	488.95	6.6	0.6	0.376578	8.16893	485.97
03R5.1	13.37	0.64	0.508	0.017	0.34681	2706.1	22.7	2648.1	36.4	2749.8	39.6	2695.3	22.1	0.1	0.45614	3.69845	2749.8
03R5.2	0.57	0.033	0.073	0.0019	0.14409	458	10.7	454.2	5.71	477.2	66.3	454.9	5.32	0.74	0.287011	4.81978	454.2
03R5.4	13.12	0.28	0.5032	0.012	0.72262	2688.3	10.2	2627.5	25.8	2734.4	14.4	2701.74	9.27	0.0021	1.79474	3.90945	2734.4
03R5.6	1.439	0.061	0.1507	0.0037	0.23061	905.3	12.7	904.9	10.4	906.3	45.2	905.04	8.89	0.98	0.62608	0.154474	904.9
03R5.7	2.43	0.1	0.2053	0.0079	0.45117	1251.5	14.8	1203.7	21.1	1334.7	40.5	1241.3	14.5	0.015	0.472419	9.81494	1334.7
03R5.9	12.61	0.34	0.486	0.013	0.44083	2651	12.8	2553.3	28.2	2726.3	23.6	2650.1	12.9	0.00011	0.63756	6.3456	2726.3
03R5.10(2)	0.613	0.03	0.077	0.0018	0.090897	485.45	9.45	478.19	5.39	519.9	57.4	479.8	4.87	0.49	0.292125	8.0227	478.19
03R6.2	5.32	0.11	0.3315	0.0075	0.4974	1872.08	8.93	1845.6	18.2	1901.5	19.8	1872.23	8.95	0.094	0.387554	2.93978	1901.5
03R6.3	14.16	0.21	0.5169	0.01	0.58962	2760.48	7.28	2686	21.3	2815.4	13.5	2769.32	6.98	3.7e-05	0.468889	4.59615	2815.4
03R6.4	2.688	0.066	0.2187	0.0049	0.35441	1325.16	9.13	1275	13	1407.2	25.7	1312.41	8.69	0.00011	0.555327	9.39454	1407.2
03R6.5	15.33	0.24	0.5415	0.012	0.58208	2835.97	7.71	2789.7	25.1	2869	15.2	2841.24	7.34	0.033	0.622147	2.76403	2869
03R6.7	14.04	0.24	0.5111	0.012	0.44019	2752.41	8.32	2661.3	25.6	2819.9	18.4	2756.66	8.26	8.3e-05	0.865979	5.62431	2819.9
03R6.8(2)	4.37	0.11	0.2953	0.0061	0.50634	1706.7	10.5	1668	15.2	1754.6	21.3	1700.3	10.4	0.0039	0.393119	4.9356	1754.6
03R6.9(1)	5.39	0.15	0.3274	0.0085	0.56819	1883.3	12	1825.8	20.7	1947.3	22.6	1882.5	12.1	0.00071	0.955145	6.23941	1947.3
03R6.9(2)	4.74	0.11	0.3061	0.0077	0.47383	1774.34	9.8	1721.5	19	1837.1	22.7	1772.83	9.87	0.0016	0.466869	6.29253	1837.1
03R7.1(2)	0.61	0.036	0.0766	0.002	0.045837	483.6	11.4	475.8	5.99	520.5	69.6	477.39	5.41	0.54	0.315506	8.5879	475.8
03R7.2(1)	14.36	0.38	0.523	0.013	0.50148	2773.8	12.7	2711.9	27.6	2819.1	21.2	2775.3	12.8	0.0094	0.734167	3.80263	2819.1
03R7.2(2)	14.27	0.23	0.5153	0.011	0.46562	2767.82	7.88	2679.2	23.4	2833.1	16.6	2772.74	7.8	2.3e-05	0.346478	5.43221	2833.1
03R7.3	5.47	0.14	0.3322	0.0076	0.57524	1895.9	11.1	1849	18.4	1947.6	20.3	1894.8	11.2	0.0019	0.435546	5.06264	1947.6
03R7.4	13.4	0.31	0.515	0.014	0.46596	2708.3	11.1	2677.9	29.8	2731	21.9	2709.6	11	0.25	0.841577	1.94434	2731
03R7.5	12.03	0.31	0.478	0.012	0.48732	2606.7	12.2	2518.5	26.2	2676	21.6	2607.8	12.3	0.00011	0.906696	5.88565	2676
03R7.6	2.858	0.077	0.2306	0.0048	0.41555	1370.9	10.2	1337.6	12.6	1423.2	25.3	1359.91	9.46	0.0078	0.486424	6.01461	1423.2
03R7.7	2.686	0.072	0.2246	0.0049	0.23696	1324.61	9.96	1306.1	12.9	1354.6	29.3	1318.38	8.78	0.2	0.350286	3.58039	1354.6
03R7.8	5.65	0.12	0.3484	0.008	0.54127	1923.76	9.25	1927	19.2	1920.3	19.3	1923.63	9.23	0.84	0.971111	-0.348904	1920.3
03R7.9	4.058	0.08	0.2855	0.0065	0.16775	1645.91	8.11	1619	16.3	1680.4	25.6	1641.85	7.72	0.11	0.739493	3.65389	1680.4
03R7.10	3.78	0.11	0.2764	0.0062	0.4445	1588.5	11.7	1573.2	15.7	1608.9	26	1584.6	11.2	0.3	0.96685	2.21891	1608.9
03R7.11	4.217	0.089	0.2888	0.0062	0.35497	1677.33	8.74	1635.5	15.5	1730	22.4	1671.97	8.6	0.0049	0.601548	5.46243	1730
03R8.1	13.54	0.25	0.521	0.013	0.34981	2718.08	8.92	2703.4	27.6	2729	21.1	2718.25	8.92	0.57	0.373737	0.938073	2729
03R8.2	9.54	0.25	0.4281	0.0095	0.24681	2391.4	12.2	2297.1	21.5	2472.7	25.4	2374.4	11.8	1.6e-05	1.3045	7.10155	2472.7
03R8.3	0.626	0.028	0.078	0.0018	0.11444	493.6	8.75	484.17	5.39	537.6	52.5	486.5	4.82	0.33	0.297132	9.93862	484.17
03R8.4	3.75	0.11	0.271	0.0065	0.2572	1582.1	11.8	1545.9	16.5	1630.8	30.6	1571.5	10.8	0.04	0.680999	5.20603	1630.8
03R8.5	20.21	0.35	0.5816	0.013	0.52608	3101.46	8.64	2955.3	26.5	3197.5	16.1	3113.96	8.4	2.3e-10	1.75	7.57467	3197.5
03R8.6	12.9	0.26	0.5055	0.012	0.55947	2672.38	9.67	2637.4	25.7	2699	17.5	2675.76	9.46	0.11	0.501047	2.28233	2699
03R8.7(1)	0.586	0.034	0.0749	0.0017	-0.027933	468.3	10.9	465.61	5.1	481.6	69.5	466.11	4.57	0.82	0.223101	3.32018	465.61
03R8.7(2)	0.591	0.032	0.0757	0.002	0.46602	471.5	10.2	470.41	6	476.9	53	470.5	5.94	0.9	0.324607	1.36087	470.41
03R8.10	3.846	0.073	0.2789	0.0066	0.48135	1602.43	7.73	1585.8	16.7	1624.3	20.7	1602.63	7.74	0.26	0.778063	2.37025	1624.3
03R9.3(1)	0.883	0.032	0.1024	0.0022	0.36247	642.6	8.64	628.46	6.44	692.6	37.2	632.35	5.99	0.11	1.30588	9.26076	628.46
03R9.4	5.606	0.094	0.3394	0.0069	0.40811	1917.02	7.34	1883.8	16.6	1953.2	18.5	1916.51	7.35	0.029	0.352809	3.55314	1953.2
03R9.10	2.62	0.097	0.2239	0.0069	0.56175	1306.3	13.6	1302.4	18.2	1312.5	31.4	1305.5	13.3	0.81	0.375495	0.769524	1312.5
03R10.2	5.44	0.12	0.341	0.0089	0.37751	1891.18	9.55	1891.5	21.4	1890.9	24.5	1891.19	9.52	0.99	0.230864	-0.0317309	1890.9
03R10.5	5.15	0.13	0.3257	0.0077	0.28382	1844.4	10.8	1817.5	18.7	1874.9	26.6	1839.9	10.4	0.15	0.935556	3.0615	1874.9
03R10.6	12.24	0.21	0.4873	0.0097	0.58582	2622.98	8.25	2559	21.1	2672.8	14.5	2630.07	8.04	0.00028	0.368613	4.25771	2672.8
03R10.7	0.589	0.023	0.0763	0.0018	0.18559	470.23	7.36	474	5.4	451.9	46.4	472.8	4.71	0.65	0.375467	-4.89046	474
03R10.10	0.591	0.033	0.0746	0.0018	0.14079	471.5	10.5	463.81	5.4	509.1	63.4	465.11	5.07	0.49	0.333333	8.89609	463.81
03R1.1	0.67	0.042	0.0764	0.0019	0.54387	520.7	12.8	474.6	5.7	728.5	56.7	471.26	5.67	3.1e-05	0.508333	34.8524
03R1.8	6.72	0.15	0.2803	0.0064	0.59872	2075.25	9.96	1592.9	16.1	2595.3	17.2	2034.9	11.9	0	0.343929	38.6237
03R1.3	0.939	0.036	0.106	0.0027	0.43427	672.36	9.44	649.48	7.88	749.8	37.7	657.09	7.27	0.014	0.588968	13.3796
03R1.4 (1)	0.69	0.025	0.0806	0.0019	0.34086	532.8	7.52	499.7	5.67	677.2	38.4	509.04	5.25	2.1e-05	0.558559	26.2109
03R1.4 (2)	0.603	0.032	0.0735	0.0018	-0.0092964	479.1	10.1	457.21	5.41	585.5	63.7	462.01	4.78	0.059	0.334783	21.9112
03R2.3(2)	0.601	0.031	0.0748	0.0019	0.34278	477.87	9.84	465.01	5.7	540.1	53.7	466.83	5.55	0.18	0.412342	13.903
03R4.10(2)	0.578	0.034	0.0667	0.0021	0.098253	463.2	10.9	416.24	6.35	703.1	68.1	426.43	5.78	0.00013	0.538272	40.7993
03R2.7	2.24	0.083	0.1929	0.0048	0.44021	1193.7	13	1137.1	13	1297.6	33.5	1163.8	11.3	4.5e-05	0.557835	12.369
03R3.1(2)	0.602	0.025	0.0735	0.0017	0.17756	478.5	7.93	457.21	5.11	581.9	47.6	462.47	4.64	0.014	0.311496	21.4281
03R3.2	2.87	0.096	0.2243	0.0061	0.16279	1374.1	12.6	1304.6	16.1	1483.8	37.5	1348.2	10.9	0.00022	0.993671	12.0771
03R4.2	0.723	0.039	0.078	0.002	0.089629	552.4	11.5	484.17	5.99	844.8	60	496.14	5.57	8.7e-08	0.312731	42.6882
03R4.4	0.715	0.028	0.0864	0.0019	0.30084	547.71	8.3	534.21	5.64	604.3	41.9	537.45	5.27	0.11	1.08845	11.5985
03R5.3	0.563	0.025	0.0753	0.0018	0.088567	453.48	8.13	468.01	5.4	380.5	54.6	463.75	4.66	0.12	0.455392	-22.9987
03R5.8	0.608	0.017	0.0757	0.0017	0.45151	482.3	5.38	470.41	5.1	539.2	29.4	475.72	4.48	0.031	0.553386	12.7578
03R5.10(1)	0.596	0.022	0.0739	0.0017	0.29576	474.69	7.01	459.61	5.11	548.3	40.8	463.85	4.67	0.041	0.42699	16.1755
03R6.1	2.11	0.13	0.1857	0.0049	0.79353	1152.1	21.2	1098	13.3	1255.2	42.8	1081.5	12.9	0.00011	1.16257	12.5239
03R6.6	11.24	0.41	0.45	0.019	0.74112	2543.2	17.1	2395.3	42.3	2663.5	24.1	2579	15	2.5e-06	0.268693	10.0695
03R7.1(1)	0.606	0.015	0.0753	0.0017	0.26815	481.03	4.75	468.01	5.1	543.6	31.4	475.11	3.93	0.029	0.473789	13.9054
03R8.8	0.618	0.025	0.0671	0.0025	0.65218	488.59	7.85	418.66	7.55	831.5	34	445.58	7.35	0	1.78354	49.65
03R8.9	0.633	0.028	0.0744	0.0021	0.25368	497.96	8.71	462.61	6.3	663.9	49.4	472.57	5.74	0.00018	0.393951	30.3193
03R9.1	0.596	0.025	0.0734	0.0017	0.29085	474.69	7.96	456.61	5.11	563.1	45.4	460.42	4.82	0.027	0.331646	18.9114
03R9.2	8.04	0.27	0.331	0.012	0.57211	2235.5	15.2	1843.2	29.1	2617.1	27.2	2241.9	16.3	0	0.744186	29.5709
03R9.3(2)	0.884	0.044	0.1002	0.0025	0.22759	643.1	11.9	615.58	7.33	741.2	53.3	621.38	6.85	0.028	0.959474	16.9482
03R9.6	0.597	0.02	0.075	0.0016	0.17007	475.33	6.37	466.21	4.8	519.6	40.2	469.25	4.14	0.21	0.345366	10.2752
03R9.8(1)	0.61	0.025	0.0741	0.0015	0.40504	483.56	7.89	460.81	4.51	592.9	40.9	463.12	4.46	0.0021	0.409339	22.2786
03R9.8(2)	0.656	0.03	0.0742	0.0016	0.45861	512.16	9.2	461.41	4.81	745.6	43	462.67	4.84	1.5e-09	0.450926	38.1156
03R9.9	0.615	0.033	0.0748	0.0019	0.23851	486.7	10.4	465.01	5.7	590.2	58.2	468.44	5.46	0.042	0.303698	21.2115
03R10.1	11.72	0.26	0.4332	0.0096	0.44707	2582.3	10.5	2320.1	21.6	2795	19.4	2573.1	10.9	0	0.621756	16.9911
03R10.3	5.12	0.12	0.307	0.0075	0.4575	1839.4	10	1725.9	18.5	1970.4	22.4	1832.2	10.2	5.5e-12	0.525812	12.4086
03R10.4	0.342	0.023	0.04621	0.0012	0.19755	298.69	8.7	291.21	3.7	357.5	75.8	291.91	3.61	0.39	0.672688	18.5427
03R10.9	0.264	0.018	0.03799	0.00096	0.14227	237.89	7.23	240.36	2.98	213.5	80.3	240.1	2.88	0.74	1.12136	-12.5808
Disc(%) = 100*[(207Pb/206Pb date) - (206Pb/238U date)]/(206Pb/238Udate)

## Sheet: UN-12-5
Analysis	207Pb/235U	2SE	206Pb/238U	2SE	ρ	207Pb/235U age (Ma)	2SE	206Pb/238U age (Ma)	2SE	207Pb/206Pb (Ma)	2SE	Concordia age (Ma)	2SE	p-value	Th/U	Disc (%)	Selected age for KDE
05R1.1	2.29	0.1	0.2001	0.0052	0.15567	1209.2	15.5	1175.9	14	1269.3	46.1	1190.2	11.3	0.083	0.697368	7.35839	1175.9
05R1.2	0.612	0.016	0.0784	0.0017	0.3853	484.82	5.05	486.57	5.09	476.6	29.7	485.68	4.21	0.76	0.436517	-2.0919	486.57
05R2.1	2.31	0.095	0.2054	0.0049	0.31548	1215.4	14.6	1204.3	13.1	1235.1	39.8	1208.9	11.2	0.5	0.684932	2.49373	1235.1
05R2.5 (1)	3.844	0.07	0.2747	0.0053	0.34409	1602.01	7.42	1564.6	13.4	1651.5	20.1	1597.37	7.29	0.0038	0.832961	5.26188	1651.5
05R2.5 (2)	3.865	0.08	0.2776	0.0061	0.51137	1606.4	8.42	1579.3	15.4	1642.2	19.8	1605.73	8.45	0.041	1.43226	3.83023	1642.2
05R2.6	13.99	0.33	0.531	0.014	0.4771	2749	11.3	2745.7	29.5	2751.5	21.4	2749.2	11.3	0.9	0.525172	0.210794	2751.5
05R2.7	11.5	0.19	0.4728	0.0098	0.35883	2564.58	7.91	2495.8	21.5	2619.4	18.1	2564.44	7.93	0.0006	1.32873	4.71864	2619.4
05R2.8	3.024	0.066	0.2424	0.0049	0.54932	1413.69	8.38	1399.2	12.7	1435.7	19.3	1412.24	8.34	0.18	0.652533	2.54231	1435.7
05R2.9	4	0.1	0.2869	0.0059	0.17993	1634.2	10.2	1626	14.8	1644.7	27.4	1631.86	9.08	0.62	0.836957	1.13699	1644.7
05R3.1	0.594	0.024	0.0766	0.0018	0.33366	473.42	7.65	475.8	5.39	461.9	43.7	475.19	5.01	0.76	0.468939	-3.00931	475.8
05R3.3	4.836	0.082	0.3225	0.0066	0.53718	1791.18	7.24	1801.9	16.1	1778.7	16.9	1790.56	7.2	0.43	0.311184	-1.30432	1778.7
05R3.5	4.056	0.073	0.2769	0.0055	0.14141	1645.51	7.42	1575.7	13.9	1735.8	23	1632.46	6.99	2.4e-06	0.48158	9.22341	1735.8
05R3.6	17.13	0.25	0.5671	0.012	0.49626	2942.14	7.28	2895.9	24.7	2973.9	15.6	2945.62	7.12	0.037	0.832838	2.62282	2973.9
05R3.7	4.87	0.21	0.3124	0.0094	0.53736	1797.1	18.2	1752.5	23.1	1849.2	33.6	1785.1	17.8	0.029	0.265517	5.22929	1849.2
05R3.9	12.54	0.21	0.499	0.0096	0.48416	2645.73	8.08	2609.5	20.7	2673.6	15.6	2647.54	8.05	0.047	0.310501	2.39752	2673.6
05R4.1	12.38	0.27	0.469	0.012	0.73746	2633.7	10.4	2479.2	26.4	2754.6	14.8	2669.98	9.13	7.3e-15	1.4925	9.99782	2754.6
05R4.2	1.792	0.048	0.1743	0.0038	0.39859	1042.55	8.76	1035.8	10.4	1056.8	27.3	1040.13	7.91	0.52	1.20628	1.98713	1035.8
05R4.4	3.141	0.095	0.2446	0.005	0.25509	1442.8	11.7	1410.6	13	1490.6	30.3	1428.67	9.83	0.033	0.753823	5.36697	1490.6
05R4.5	0.588	0.031	0.075	0.0018	0.043679	469.59	9.92	466.21	5.4	486.1	62.9	466.94	4.83	0.76	0.368726	4.09175	466.21
05R4.6	1.786	0.04	0.1735	0.0036	0.52824	1040.37	7.32	1031.37	9.9	1059.3	21.3	1038.54	7.13	0.3	1.14043	2.63665	1031.37
05R4.7	2.708	0.067	0.2282	0.0044	0.2911	1330.65	9.22	1325.1	11.6	1339.7	25.8	1328.73	8.16	0.66	0.570598	1.0898	1339.7
05R4.8	13.71	0.3	0.508	0.014	0.42902	2729.9	10.5	2648.1	30	2791	22.2	2732.6	10.5	0.0025	0.576582	5.12003	2791
05R4.9	13.08	0.23	0.498	0.011	0.45136	2685.44	8.49	2605.2	23.7	2746.4	17.7	2688.86	8.46	0.00016	0.877474	5.14128	2746.4
05R4.10	5.46	0.1	0.3282	0.0066	0.3439	1894.33	7.96	1829.7	16	1966	19.9	1888.89	7.93	2.2e-05	0.41321	6.93286	1966
05R5.2	0.601	0.028	0.0776	0.0023	0.43088	477.87	8.89	481.78	6.88	459.1	47.9	480.66	6.42	0.65	0.467898	-4.9401	481.78
05R5.3(1)	3.733	0.099	0.2714	0.007	0.5665	1578.5	10.7	1547.9	17.8	1619.6	22.8	1577.5	10.7	0.037	2.06641	4.42702	1619.6
05R5.4	2.692	0.062	0.2186	0.0046	0.44227	1326.26	8.57	1274.5	12.2	1410.9	22.5	1314.95	8.37	5.5e-06	0.706957	9.66759	1410.9
05R5.5	2.441	0.05	0.2062	0.0042	0.4365	1254.77	7.43	1208.5	11.2	1335	21.1	1246.6	7.3	9.4e-06	0.807775	9.47566	1335
05R5.6	14.36	0.44	0.52	0.018	0.55712	2773.8	14.7	2699.2	38.2	2828.5	25.5	2780.7	14.4	0.021	0.407622	4.57133	2828.5
05R5.7	12.77	0.25	0.498	0.013	0.39465	2662.83	9.39	2605.2	28	2706.9	21.5	2664.24	9.39	0.025	1.25686	3.75707	2706.9
05R5.8	0.592	0.023	0.077	0.0016	0.14333	472.14	7.34	478.19	4.8	442.9	46	476.56	4.26	0.46	0.459788	-7.96794	478.19
05R5.10	2.25	0.055	0.2034	0.0042	0.45701	1196.79	8.63	1193.6	11.3	1202.6	23.5	1195.93	8.16	0.76	0.498509	0.748379	1193.6
05R6.1	2.86	0.069	0.2323	0.005	0.28702	1371.44	9.12	1346.5	13.1	1410.4	26.3	1364.84	8.45	0.068	0.484315	4.53063	1410.4
05R6.2	4.23	0.097	0.2919	0.0071	0.60301	1679.86	9.49	1651	17.7	1716.1	19.6	1681.53	9.49	0.043	1.52209	3.79349	1716.1
05R6.3	0.597	0.035	0.0769	0.0022	0.19613	475.3	11.1	477.59	6.59	464.4	66.5	477.12	6.11	0.85	0.354816	-2.84022	477.59
05R6.4	12.19	0.39	0.495	0.014	0.64821	2619.1	15.1	2592.3	30.2	2640	21.4	2622.5	14.9	0.25	0.246565	1.80682	2640
05R6.5	2.117	0.074	0.1918	0.0042	0.36968	1154.4	12.1	1131.1	11.4	1198.3	33.3	1141.43	9.78	0.079	0.879589	5.60794	1131.1
05R6.7	1.7	0.074	0.1644	0.0038	0.23666	1008.5	13.9	981.2	10.5	1068.4	44.5	989.77	9.37	0.077	0.848297	8.16174	981.2
05R6.10	2.82	0.13	0.2263	0.005	0.093948	1360.9	17.3	1315.1	13.2	1433.5	47	1330.7	11.1	0.029	1.19198	8.2595	1433.5
05R7.2	5.16	0.11	0.3294	0.0068	0.44458	1846.04	9.15	1835.5	16.5	1858	20.2	1845.28	9.1	0.48	0.734146	1.21098	1858
05R7.3	3.74	0.15	0.2647	0.0077	0.50868	1580	16.1	1513.8	19.6	1669.4	33	1558.4	15.6	0.00024	0.684636	9.32071	1669.4
05R7.4	14.89	0.43	0.521	0.012	0.44308	2808.2	13.9	2703.4	25.5	2884.4	22.9	2800.5	14.1	4.7e-06	0.788471	6.27514	2884.4
05R7.5	1.544	0.061	0.1588	0.0047	0.34624	948.1	12.2	950.1	13.1	943.5	41.4	949	10.3	0.89	0.312344	-0.699523	950.1
05R7.6	0.604	0.026	0.0768	0.0019	0.22005	479.77	8.24	476.99	5.69	493.1	49.3	477.76	5.13	0.76	0.438356	3.26709	476.99
05R7.7	12.38	0.26	0.4856	0.01	0.50773	2633.7	10	2551.6	21.7	2697.3	17.4	2636.1	10.1	1.2e-05	0.414634	5.4017	2697.3
05R8.2	14.33	0.26	0.5129	0.011	0.62907	2771.8	8.81	2669	23.5	2847.5	14.5	2786.46	8.37	8.4e-08	0.699153	6.26866	2847.5
05R8.4	6.28	0.16	0.3577	0.0087	0.49936	2015.7	11.2	1971.3	20.7	2061.5	22.2	2014.2	11.3	0.013	0.481393	4.37545	2061.5
05R8.5	18.23	0.36	0.571	0.013	0.68565	3001.95	9.72	2911.9	26.7	3062.8	14.1	3018.5	8.89	2.3e-05	0.623318	4.92686	3062.8
05R9.1	2.081	0.05	0.1918	0.0036	0.13174	1142.56	8.28	1131.12	9.75	1164.4	28.3	1137.9	6.73	0.34	0.566372	2.85812	1131.12
05R9.2	14.91	0.43	0.518	0.015	0.51315	2809.5	13.9	2690.7	31.9	2895.9	23.4	2814.8	13.9	1.3e-05	0.361149	7.08588	2895.9
05R9.3	5.28	0.1	0.3328	0.0077	0.5864	1865.63	8.18	1851.9	18.6	1880.9	17.8	1866.96	8.07	0.37	0.97561	1.54182	1880.9
05R9.4	32.16	0.67	0.71	0.016	0.47216	3555.2	10.5	3458.5	30.2	3610.2	17.6	3560.6	10.5	0.00031	0.161446	4.20198	3610.2
05R9.5	14.96	0.46	0.522	0.017	0.609	2812.7	14.8	2707.7	36	2888.9	23	2825.5	14.3	0.00034	0.395939	6.27228	2888.9
05R9.6	2.6	0.1	0.2171	0.0053	0.2806	1300.6	14.1	1266.5	14.1	1357.4	38	1283.1	11.4	0.045	0.700389	6.69663	1357.4
05R9.7	0.557	0.02	0.0723	0.0017	0.14061	449.57	6.53	450	5.12	447.4	44.6	449.84	4.29	0.96	0.615741	-0.581135	450
05R9.10	0.715	0.044	0.0896	0.0022	0.17578	547.7	13	553.17	6.51	525.1	68.1	552.34	6.18	0.69	0.747748	-5.34565	553.17
05R10.1(1)	5.4	0.14	0.3363	0.0092	0.42259	1884.9	11.2	1868.8	22.2	1902.5	25.9	1884.1	11.2	0.43	0.241444	1.77135	1902.5
05R10.1(2)	5.3	0.2	0.3245	0.01	0.61792	1868.9	16.2	1811.7	24.4	1933.1	27.6	1865.7	16.4	0.0028	0.391486	6.28007	1933.1
05R10.2	4.98	0.12	0.3201	0.0089	0.56475	1815.9	10.3	1790.2	21.8	1845.6	22.3	1817.6	10.2	0.16	0.214902	3.00173	1845.6
05R10.3	3.165	0.066	0.2471	0.0058	0.55584	1448.66	8.11	1423.5	15	1485.8	20.1	1449	8.13	0.044	0.526132	4.19303	1485.8
05R10.4	5.45	0.12	0.331	0.0074	0.39724	1892.76	9.53	1843.2	17.9	1947.5	22	1888.61	9.51	0.0029	0.261531	5.35558	1947.5
05R10.5(2)	4.728	0.094	0.311	0.0077	0.69311	1772.22	8.42	1745.6	19	1803.7	16.7	1777.29	7.97	0.067	0.449239	3.22116	1803.7
05R10.7	1.52	0.11	0.1591	0.0052	0.35642	938.5	22.2	951.8	14.5	907.4	70	949	13.7	0.54	0.8375	-4.8931	951.8
05R10.9	0.592	0.026	0.0755	0.0018	0.1326	472.14	8.3	469.21	5.4	486.4	52	470	4.79	0.75	0.419945	3.53413	469.21
05R10.10(2)	0.58	0.036	0.0753	0.0017	0.18326	464.5	11.6	468.01	5.1	447	69	467.62	4.93	0.76	0.227594	-4.70022	468.01
05R11.2	2.581	0.054	0.2177	0.0045	0.52972	1295.27	7.71	1269.7	11.9	1337.9	19.7	1292.64	7.69	0.013	0.368945	5.09754	1337.9
05R11.3	11.93	0.2	0.4863	0.011	0.36077	2598.92	8.05	2554.6	23.9	2633.6	19.2	2599.42	8.06	0.047	0.757735	2.9997	2633.6
05R11.5	5.018	0.091	0.3193	0.006	0.30565	1822.36	7.78	1786.3	14.7	1863.8	19.9	1817.94	7.61	0.012	0.297067	4.15817	1863.8
05R11.6	0.602	0.031	0.0762	0.0018	0.35471	478.5	9.83	473.4	5.4	503	53.4	473.99	5.29	0.59	0.397857	5.88469	473.4
05RR11.7	0.614	0.06	0.0776	0.0026	0.036928	486.1	18.9	481.78	7.78	506	112	482.36	7.29	0.83	0.442771	4.78656	481.78
05R11.10	21.11	0.44	0.5897	0.013	0.49822	3143.7	10.3	2988.2	26.4	3244.5	17.4	3152.2	10.3	1.2e-11	0.417531	7.89952	3244.5
05R2.2	0.685	0.026	0.072	0.0017	0.51384	529.79	7.84	448.19	5.12	898.8	33.9	454.47	5.17	0	0.355756	50.1346
05R2.3 (1)	0.3222	0.008	0.0458	0.0014	0.7612	283.59	3.08	288.68	4.32	241.8	23	283.17	3.06	0.071	0.180036	-19.3879
05R2.3 (2)	0.3221	0.0064	0.04675	0.0011	0.74795	283.52	2.47	294.54	3.39	193.6	18.5	283.09	2.45	1.1e-06	0.080112	-52.1384
05R2.4	0.579	0.024	0.076	0.0019	0.35438	463.82	7.72	472.2	5.7	422.5	44.8	469.85	5.25	0.28	0.427333	-11.7633
05R3.2	3.587	0.056	0.2555	0.0051	0.47992	1546.66	6.29	1466.8	13.1	1657.6	17.4	1546.69	6.33	3.7e-12	0.584956	11.5106
05R3.4	0.583	0.028	0.077	0.0018	0.0081371	466.39	8.99	478.19	5.39	408.7	59.6	475.06	4.63	0.26	0.275415	-17.0027
05R3.8	0.59	0.031	0.0729	0.0017	0.015161	470.87	9.9	453.6	5.11	555.9	62.4	457.11	4.59	0.12	0.470203	18.4026
05R4.3	1.048	0.029	0.0798	0.0017	0.54616	727.89	7.21	494.93	5.08	1533	22.7	498.41	5.36	0	0.720657	67.7149
05R5.1	0.766	0.034	0.0961	0.002	0.28187	577.47	9.78	591.51	5.89	522.6	47.6	588.81	5.57	0.15	1.41714	-13.186
05R5.9	0.623	0.021	0.0764	0.0016	0.20669	491.73	6.58	474.6	4.8	572.3	39	479.81	4.25	0.019	0.388843	17.0715
05R6.6	3.05	0.18	0.0909	0.003	0.1984	1420.2	22.6	560.86	8.87	3142	49.1	553.53	9.03	0	0.724428	82.1496
05R6.8	2.622	0.051	0.2124	0.0052	0.45086	1306.82	7.2	1241.6	13.8	1415.6	22.6	1303.74	7.25	1.3e-07	0.34094	12.2916
05R7.10	0.582	0.038	0.073	0.0022	-0.047803	465.7	12.2	454.2	6.61	523.1	80.3	456.92	5.71	0.42	0.307773	13.1715
05R8.3	3.023	0.088	0.2296	0.0053	0.52391	1413.4	11.1	1332.4	13.9	1537.8	24.6	1389	11	8.9e-11	0.657548	13.3567
05R9.8	0.605	0.028	0.0747	0.0019	0.28687	480.4	8.86	464.41	5.7	557.5	50.2	467.83	5.37	0.079	0.312221	16.6978
05R9.9(1)	0.54	0.051	0.069	0.0018	0.22149	438.4	16.8	430.13	5.43	482	102	430.4	5.41	0.62	1.48323	10.7614
05R9.9(2)	0.733	0.046	0.0704	0.0017	0.1963	558.3	13.5	438.57	5.12	1082.2	62.9	444.81	5.1	0	1.72656	59.4742
05R10.5(1)	3.99	0.1	0.2485	0.0069	0.48548	1632.2	10.2	1430.7	17.8	1902.5	24.3	1615.1	10.7	0	0.361111	24.7989
05R10.8	0.875	0.028	0.0761	0.0017	0.24874	638.28	7.59	472.8	5.1	1278.4	33.4	505.72	4.9	0	0.455364	63.0163
05R10.10(1)	0.58	0.06	0.0728	0.0019	0.12532	464.5	19.3	453	5.71	522	114	453.56	5.64	0.56	0.228947	13.2184
05R11.1	9.71	0.33	0.2728	0.0079	0.52153	2407.7	15.7	1555	20	3235.5	24.8	1613.5	27.6	0	0.736434	51.9394
05R11.8	0.594	0.026	0.0737	0.002	0.30622	473.42	8.29	458.41	6.01	546.8	48	462.54	5.53	0.083	0.33817	16.165
05R11.9	0.742	0.076	0.0773	0.0021	0.42674	563.6	22.2	479.99	6.29	917.1	96.8	475.5	6.21	8.2e-05	0.350569	47.6622

## Sheet: UY-12-1
Analysis	207Pb/235U	2SE	206Pb/238U	2SE	ρ	207Pb/235U age (Ma)	2SE	206Pb/238U age (Ma)	2SE	207Pb/206Pb (Ma)	2SE	Concordia age (Ma)	2SE	p-value	Th/U	Disc (%)	Selected age for KDE
UY1R2.2-1	0.637	0.029	0.0794	0.0015	0.36421	500.45	9	492.54	4.49	536.8	46.5	493.12	4.45	0.35	0.394761	8.24516	492.54
UY1R2.2-2	0.608	0.029	0.0778	0.0017	0.098196	482.3	9.16	482.98	5.09	479.1	55.8	482.83	4.62	0.95	0.245303	-0.809852	482.98
UY1R2.3-1	0.617	0.027	0.079	0.0014	0.32315	487.97	8.48	490.15	4.19	477.7	46	489.95	4.12	0.79	0.347301	-2.60624	490.15
UY1R2.5-2	0.623	0.023	0.0792	0.0014	0.060257	491.73	7.2	491.35	4.19	493.5	44.1	491.44	3.71	0.96	0.326872	0.435664	491.35
UY1R3.4	0.627	0.035	0.0785	0.0013	0.09415	494.2	10.9	487.16	3.89	527.1	62.2	487.78	3.77	0.53	0.183833	7.57731	487.16
UY1R3.5	0.594	0.029	0.0766	0.0017	0.19274	473.42	9.24	475.8	5.1	461.9	55	475.36	4.78	0.81	0.314092	-3.00931	475.8
UY1R4.3	3.498	0.064	0.2701	0.0041	0.55964	1526.76	7.3	1541.3	10.4	1506.7	15.3	1528.65	7.15	0.1	0.850651	-2.29641	1506.7
UY1R4.4	0.64	0.017	0.0819	0.0013	0.17895	502.31	5.27	507.45	3.88	478.9	31.5	505.79	3.37	0.39	0.533997	-5.96158	507.45
UY1R5.1	0.604	0.026	0.0771	0.0015	0.28921	479.77	8.24	478.79	4.5	484.5	46.2	478.93	4.34	0.9	0.356009	1.17853	478.79
UY1R5.2-1	0.645	0.018	0.0811	0.002	0.31652	505.4	5.57	502.69	5.97	517.7	33.9	504.18	4.67	0.69	0.508122	2.89936	502.69
UY1R5.4	0.62	0.024	0.0789	0.0013	0.10261	489.85	7.53	489.55	3.89	491.2	44.7	489.61	3.59	0.97	0.397318	0.335912	489.55
UY1R5.5	3.98	0.12	0.2872	0.0046	0.4343	1630.1	12.3	1627.5	11.6	1633.5	25.5	1628.7	10.1	0.84	0.761074	0.367309	1633.5
UY1R6.1	0.644	0.027	0.0812	0.0015	0.35591	504.78	8.35	503.28	4.48	511.6	43.3	503.44	4.4	0.85	0.734879	1.62627	503.28
UY1R6.2	0.616	0.03	0.0779	0.0012	0.27073	487.34	9.43	483.58	3.6	505.1	51.7	483.74	3.58	0.68	0.220894	4.26054	483.58
UY1R6.3	0.615	0.025	0.0773	0.0016	0.084123	486.71	7.87	479.99	4.79	518.5	48.4	481.67	4.25	0.45	0.311585	7.42719	479.99
UY1R6.5	14.48	0.36	0.543	0.011	0.70459	2781.7	12	2796	23	2771.3	15	2779.1	11.6	0.4	0.316678	-0.891278	2771.3

## Sheet: UY-12-2
Analysis	207Pb/235U	2SE	206Pb/238U	2SE	ρ	207Pb/235U age (Ma)	2SE	206Pb/238U age (Ma)	2SE	207Pb/206Pb (Ma)	2SE	Concordia age (Ma)	2SE	p-value	Th/U	Disc (%)	Selected age for KDE
UY2R1.1	0.605	0.028	0.0774	0.0012	0.055758	480.4	8.86	480.58	3.6	479.5	53.1	480.56	3.4	0.98	0.29463	-0.225235	480.58
UY2R1.2	13.07	0.25	0.5079	0.0071	0.32761	2684.72	9.2	2647.7	15.2	2712.7	16.6	2678.45	8.89	0.014	1.02429	2.39614	2712.7
UY2R2.2	0.608	0.033	0.0779	0.0013	0.25419	482.3	10.4	483.58	3.9	476.2	58.2	483.52	3.87	0.9	0.273054	-1.54977	483.58
UY2R2.3	0.617	0.029	0.0789	0.0013	0.19016	487.97	9.11	489.55	3.89	480.5	51.7	489.4	3.78	0.86	0.321205	-1.88345	489.55
UY2R2.4	0.649	0.042	0.0803	0.0018	0.14973	507.9	12.9	497.91	5.38	552.9	71.2	498.94	5.2	0.45	0.251416	9.94574	497.91
UY2R3.1	0.606	0.028	0.0778	0.0015	0.13451	481.03	8.86	482.98	4.49	471.8	52.7	482.65	4.2	0.84	0.595902	-2.36965	482.98
UY2R3.2	13.47	0.25	0.5125	0.0067	0.19847	2713.18	8.96	2667.3	14.3	2747.5	17.2	2702.57	8.29	0.0028	1.77174	2.91902	2747.5
UY2R4.1	0.63	0.041	0.0812	0.0017	0.14887	496.1	12.8	503.28	5.08	463.1	72.4	502.59	4.92	0.58	0.214677	-8.67631	503.28
UY2R4.2	0.611	0.02	0.0786	0.0015	0.29567	484.19	6.31	487.76	4.49	467.3	36.2	486.78	4.11	0.59	0.407216	-4.37834	487.76
UY2R4.3	2.99	0.088	0.2414	0.0047	0.59381	1405.1	11.2	1394	12.2	1422	22.9	1400.6	10.5	0.3	0.564286	1.96906	1422
UY2R4.4	2.591	0.054	0.2172	0.0037	0.38874	1298.1	7.69	1267.06	9.82	1349.8	20.6	1288.42	7.14	0.0017	0.358407	6.1298	1349.8
UY2R5.3	14.13	0.3	0.5489	0.0087	0.65184	2758.5	10.2	2820.6	18.2	2713.3	13.8	2752.7	10.1	1.1e-05	1.05263	-3.95459	2713.3
UY2R5.4	3.536	0.1	0.2727	0.0055	0.58461	1535.3	11.2	1554.5	14	1509	22.1	1540	10.7	0.1	0.412857	-3.01524	1509
UY2R6.3	0.615	0.032	0.0784	0.0014	0.16945	486.7	10.1	486.57	4.19	487.4	57.5	486.58	4.07	0.99	0.307349	0.170291	486.57
UY2R7.1	1.921	0.039	0.1834	0.0028	0.46725	1088.42	6.82	1085.52	7.65	1094.2	19	1087.28	6.15	0.7	0.318694	0.793274	1085.52
UY2R7.2	0.61	0.015	0.07713	0.0011	0.4496	483.56	4.74	478.97	3.3	505.4	24.5	479.88	3.19	0.3	0.315204	5.22952	478.97
UY2R7.3	1.927	0.041	0.1826	0.0026	0.56094	1090.5	7.15	1081.16	7.11	1109.2	17.9	1085.74	6.32	0.17	0.421008	2.52795	1081.16
UY2R7.4	3.745	0.097	0.2706	0.0045	0.42463	1581	10.4	1543.8	11.4	1631	22.6	1564.98	9.33	0.0017	0.897756	5.34641	1631
UY2R8.1	12.2	0.27	0.4882	0.0097	0.5409	2619.9	10.5	2562.9	21.1	2664.3	17.1	2621.6	10.6	0.0013	0.404486	3.80588	2664.3
UY2R8.2	0.613	0.026	0.0785	0.0014	0.21547	485.45	8.19	487.16	4.19	477.4	46.8	486.91	4.01	0.84	0.70625	-2.04441	487.16
UY2R8.3	0.629	0.051	0.0792	0.0016	0.11809	495.5	15.9	491.35	4.79	514.6	89.2	491.57	4.71	0.8	0.296842	4.51807	491.35
UY2R8.4	5.46	0.15	0.3365	0.0072	0.37101	1894.3	11.9	1869.8	17.4	1921.3	25.2	1888.9	11.3	0.15	0.700913	2.68048	1921.3
UY2R8.5	13.19	0.3	0.5163	0.0091	0.4619	2693.3	10.9	2683.5	19.4	2700.8	18	2692.7	10.8	0.57	0.495125	0.640551	2700.8
UY2R9.1	5.37	0.15	0.3355	0.0058	0.22694	1880.1	12	1865	14	1896.8	26.5	1874	10.1	0.35	0.347537	1.67651	1896.8
UY2R9.2	5.392	0.12	0.3414	0.0052	0.59305	1883.58	9.62	1893.4	12.5	1872.8	16.5	1885.43	9.35	0.35	0.865	-1.09996	1872.8
UY2R9.3	1.949	0.069	0.1833	0.004	0.11715	1098.1	11.9	1085	10.9	1124.2	39.3	1090.85	8.53	0.39	0.88623	3.48692	1085
UY2R9.5	1.916	0.053	0.1833	0.0026	0.17846	1086.68	9.26	1084.98	7.11	1090.1	28.9	1085.56	6.1	0.87	0.455053	0.469682	1084.98
UY2R10.1	13.54	0.32	0.5261	0.0088	0.47929	2718.1	11.3	2725	18.6	2712.9	18	2718.7	11.2	0.68	0.725753	-0.446017	2712.9
UY2R10.2	13.6	0.28	0.5319	0.0082	0.5378	2722.26	9.91	2749.5	17.3	2702.2	15.2	2722.78	9.86	0.066	1.4891	-1.75043	2702.2
UY2R10.3	15.87	0.37	0.5497	0.0094	0.26731	2869	11.3	2823.9	19.6	2900.8	20.5	2861.2	10.9	0.023	0.777297	2.65099	2900.8
UY2R10.4	11.65	0.31	0.489	0.0085	0.39757	2576.7	12.6	2566.3	18.5	2584.8	21.4	2574.6	12	0.56	1.90345	0.715723	2584.8
UY2R10.5	3.608	0.085	0.2678	0.0047	0.29466	1551.3	9.42	1529.6	12	1580.9	23.4	1543.98	8.43	0.093	1.02656	3.24499	1580.9
UY2R11.1-1	5.714	0.12	0.3466	0.0059	0.57879	1933.49	9.17	1918.3	14.2	1949.8	16.2	1932.53	9.17	0.19	0.444065	1.61555	1949.8
UY2R11.1-2	5.65	0.11	0.3464	0.0058	0.52134	1923.76	8.5	1917.4	13.9	1930.6	16.3	1923.32	8.46	0.6	0.381169	0.683725	1930.6
UY2R11.3	0.632	0.023	0.0794	0.0014	0.27421	497.34	7.16	492.54	4.19	519.5	39.4	493.39	3.99	0.51	0.395628	5.18961	492.54
UY2R11.4-1	11.94	0.26	0.4907	0.0079	0.57855	2599.7	10.4	2573.7	17.1	2620	15.4	2599.2	10.4	0.065	0.1616	1.76718	2620
UY2R11.4-2	11.67	0.51	0.4923	0.011	0.18579	2578.3	20.5	2580.6	23.8	2576.5	37.9	2579.2	16.9	0.93	0.808434	-0.159131	2576.5
UY2R12.1	13.13	0.27	0.5049	0.0086	0.50344	2689.04	9.87	2634.8	18.5	2730.1	16	2687.96	9.93	0.00072	1.34109	3.49071	2730.1
UY2R12.2	9.65	0.24	0.4449	0.0084	0.53524	2401.9	11.6	2372.5	18.8	2427	18.7	2400	11.6	0.066	0.755031	2.24557	2427
UY2R12.3	2.119	0.047	0.1969	0.0036	0.52224	1155.01	7.69	1158.65	9.71	1148.2	20.1	1155.97	7.31	0.68	0.494457	-0.91012	1158.65
UY2R13.3	15.18	0.38	0.5532	0.0097	0.53319	2826.6	12.1	2838.5	20.2	2818.1	18	2827.2	12	0.49	0.572932	-0.723892	2818.1
UY2R13.4	13.75	0.3	0.5153	0.0085	0.29155	2732.6	10.5	2679.2	18.1	2772.4	19.3	2723.7	10.2	0.0032	0.324977	3.36171	2772.4
UY2R13.5	13.12	0.29	0.5102	0.0092	0.47848	2688.3	10.6	2657.5	19.7	2711.6	17.5	2687.1	10.6	0.076	0.785778	1.99513	2711.6
UY2R14.1	32.82	0.68	0.737	0.016	0.68844	3575.2	10.5	3559.4	29.8	3584.1	13.5	3578.11	9.64	0.51	0.400176	0.689155	3584.1
UY2R14.2	9.68	0.41	0.426	0.017	0.8954	2404.8	19.6	2287.7	38.4	2505.5	16.3	2470.7	14	2.5e-07	0.515172	8.69288	2505.5
UY2R14.3-1	0.627	0.028	0.0789	0.0015	0.19519	494.23	8.74	489.55	4.49	515.9	49.5	490.26	4.27	0.6	0.502532	5.10758	489.55
UY2R14.3-2	0.619	0.027	0.079	0.0013	0.048241	489.22	8.47	490.15	3.89	484.9	50.7	490	3.6	0.92	0.346667	-1.0827	490.15
UY2R14.4	5.281	0.12	0.3316	0.0051	0.68538	1865.8	9.78	1846.1	12.4	1887.8	15.2	1862.8	9.77	0.033	0.396081	2.20892	1887.8
UY2R14.5	14.32	0.3	0.5205	0.0087	0.47937	2771.1	10.1	2701.3	18.5	2822.4	16.3	2767.9	10.2	1.9e-05	0.549248	4.29067	2822.4
UY2R15.2	1.761	0.061	0.1715	0.0038	0.35555	1031.2	11.2	1020.4	10.5	1054.3	34.2	1025.16	8.95	0.38	0.584503	3.2154	1020.4
UY2R15.3-2	0.632	0.025	0.0801	0.0015	0.17726	497.34	7.78	496.72	4.48	500.2	44.8	496.85	4.16	0.94	0.326908	0.695722	496.72
UY2R15.4	4.377	0.11	0.3011	0.0056	0.2927	1708	10.5	1696.8	13.9	1721.8	24.5	1704.56	9.45	0.45	0.78488	1.45197	1721.8

## Sheet: UY-12-3
Analysis	207Pb/235U	2SE	206Pb/238U	2SE	ρ	207Pb/235U age (Ma)	2SE	206Pb/238U age (Ma)	2SE	207Pb/206Pb (Ma)	2SE	Concordia age (Ma)	2SE	p-value	Th/U	Disc (%)	Selected age for KDE
UY03R1.1-1	15.26	0.84	0.533	0.02	0.35931	2831.6	26.3	2754.1	42.1	2887.3	44.2	2817.2	25.9	0.057	0.832943	4.61331	2887.3
UY03R1.1-2	15.73	0.89	0.543	0.022	0.33498	2860.5	27.1	2796	46	2906.3	46.7	2850	26.6	0.15	0.590812	3.7952	2906.3
UY03R1.2	2.61	0.2	0.2214	0.009	0.073926	1303.5	28.1	1289.3	23.8	1326.9	81.4	1295	18.9	0.69	1.44762	2.83367	1326.9
UY03R1.3-1	16.22	0.83	0.5723	0.021	0.4024	2889.9	24.5	2917.3	43.1	2870.8	40.4	2892.8	24	0.5	0.507944	-1.61976	2870.8
UY03R1.3-2	16.04	0.81	0.569	0.022	0.27579	2879.2	24.2	2903.7	45.2	2862.1	44.5	2882.5	23.3	0.59	0.557216	-1.45348	2862.1
UY03R1.4	16.48	0.89	0.561	0.022	0.421	2905.1	25.9	2870.8	45.5	2928.9	41.9	2901.5	25.8	0.41	0.847874	1.98368	2928.9
UY03R1.5	2.011	0.11	0.1855	0.007	0.44066	1119.2	18.6	1097	19	1162.7	50.6	1108.4	16.1	0.26	0.464583	5.65064	1097
UY03R1.6	4.679	0.23	0.3109	0.011	0.35538	1763.5	20.6	1745.1	27.1	1785.3	45	1758	19	0.51	0.453931	2.25172	1785.3
UY03R1.7	15.36	0.79	0.5566	0.021	0.48748	2837.8	24.6	2852.6	43.5	2827.4	38.2	2838.6	24.4	0.7	0.433548	-0.891278	2827.4
UY03R1.8	4.54	0.23	0.3016	0.011	0.15006	1738.3	21.1	1699.2	27.3	1785.7	52.8	1724.2	18.1	0.22	1.50857	4.84404	1785.7
UY03R1.9	5.88	0.31	0.3485	0.013	0.1072	1958.3	22.9	1927.4	31.1	1991.1	54.5	1947.8	19.5	0.4	1.04762	3.19924	1991.1
UY03R1.10	11.74	0.66	0.489	0.02	0.52658	2583.9	26.4	2566.3	43.3	2597.7	41.1	2582.7	26.4	0.64	0.7665	1.20876	2597.7
UY03R1.12	3.82	0.25	0.2819	0.01	0.1157	1597	26.4	1600.9	25.2	1591.8	66.1	1599	19.2	0.91	0.36563	-0.57168	1591.8
UY03R2.1-1	5.3	0.27	0.3342	0.012	0.25014	1868.9	21.8	1858.7	29	1880.2	49.2	1865.6	19.4	0.75	0.370229	1.1435	1880.2
UY03R2.1-2	4.79	0.24	0.3254	0.012	0.26805	1783.1	21.1	1816	29.2	1744.9	49.2	1792.4	18.9	0.29	0.128497	-4.07473	1744.9
UY03R2.2	5.25	0.26	0.3453	0.012	0.44209	1860.8	21.2	1912.1	28.8	1803.9	42.1	1872.6	19.7	0.059	0.320385	-5.99812	1803.9
UY03R2.3	11.06	0.55	0.4596	0.017	0.3271	2528.2	23.2	2437.8	37.6	2601.6	42.9	2510.5	22.8	0.015	1.04745	6.29613	2601.6
UY03R2.4	1.602	0.089	0.1673	0.0063	0.37284	971	17.4	997.2	17.4	912.1	55.9	983.8	14.2	0.18	0.266394	-9.33012	997.2
UY03R2.5	12.1	0.6	0.5122	0.018	0.37123	2612.2	23.3	2666	38.4	2570.7	41.1	2620.2	22.3	0.14	0.743432	-3.70716	2570.7
UY03R2.6	12.62	0.69	0.514	0.022	0.31404	2651.7	25.8	2673.7	46.9	2635	48.2	2654.6	24.9	0.63	0.357971	-1.46869	2635
UY03R2.7	1.521	0.093	0.1577	0.0057	0.16801	938.9	18.7	944	15.9	926.9	67.4	941.9	13.1	0.82	1.13515	-1.84486	944
UY03R2.8	2.434	0.13	0.2198	0.0083	0.29107	1252.7	19.2	1280.8	21.9	1204.7	54.9	1264	16.2	0.25	0.274653	-6.31693	1204.7
UY03R2.10	12.73	0.61	0.4975	0.018	0.31022	2659.9	22.6	2603	38.8	2703.4	41.6	2650.3	22	0.14	0.545455	3.71384	2703.4
UY03R2.11	2.604	0.13	0.2302	0.0092	0.64669	1301.8	18.3	1335.5	24.1	1246.5	38.1	1306.3	17.8	0.07	0.231375	-7.13999	1246.5
UY03R3.1	2.838	0.14	0.2355	0.0086	0.23278	1365.6	18.5	1363.3	22.4	1369.4	52.1	1364.7	15.8	0.93	0.593286	0.445451	1369.4
UY03R3.4	13.06	0.77	0.5099	0.019	0.43552	2684	27.9	2656.2	40.6	2705	45	2678.4	27.1	0.46	0.191936	1.80407	2705
UY03R3.5	1.798	0.097	0.1792	0.0065	0.049243	1044.7	17.6	1062.6	17.8	1007.5	64.5	1053.5	12.7	0.46	0.464129	-5.46898	1062.6
UY03R3.6	14.89	0.77	0.539	0.021	0.40558	2808.2	24.7	2779.3	44	2829.1	41.4	2805.3	24.5	0.48	0.385839	1.76028	2829.1
UY03R3.7	4.56	0.25	0.3057	0.012	0.16694	1742	22.9	1719.5	29.6	1769.1	56.6	1734.1	19.6	0.51	0.828099	2.80369	1769.1
UY03R3.8	2.737	0.15	0.2304	0.0088	0.08385	1338.6	20.4	1336.6	23.1	1341.7	62	1337.7	15.9	0.95	0.371039	0.380115	1341.7
UY03R3.9	4.174	0.21	0.2999	0.012	0.33337	1668.9	20.6	1690.8	29.8	1641.5	49.1	1674.2	19.1	0.47	0.32025	-3.00335	1641.5
UY03R3.10	9.4	0.53	0.439	0.018	0.55406	2377.8	25.9	2346.2	40.3	2405.1	40.9	2375.1	26	0.35	0.380148	2.44896	2405.1
UY03R3.11	14.9	0.73	0.5466	0.02	0.40633	2808.9	23.4	2811	41.7	2807.3	39.2	2809.1	23	0.96	2.23695	-0.131799	2807.3
UY03R4.1	11.27	0.64	0.4803	0.019	0.38086	2545.7	26.5	2528.6	41.4	2559.4	46.5	2542.6	25.7	0.67	0.478435	1.20341	2559.4
UY03R4.2	15.36	0.81	0.539	0.022	-0.066699	2837.8	25.2	2779.3	46.1	2879.7	56	2823.2	21.8	0.28	0.796275	3.48647	2879.7
UY03R4.3-2	3.94	0.23	0.2736	0.011	0.1347	1621.9	23.7	1559	27.9	1704.5	61.1	1595.5	19.6	0.066	0.449342	8.53623	1704.5
UY03R4.5	13.17	0.85	0.486	0.02	0.20239	2691.9	30.5	2553.3	43.4	2797.7	56.7	2648.2	28.4	0.0037	0.628494	8.73575	2797.7
UY03R4.6-1	15.54	0.83	0.518	0.022	0.57188	2848.9	25.6	2690.7	46.7	2962.9	36.8	2850.7	26.3	3e-05	0.449198	9.18695	2962.9
UY03R4.6-2	15.35	0.78	0.5595	0.021	0.54719	2837.2	24.3	2864.6	43.4	2817.8	35.8	2837.4	24.2	0.45	0.472696	-1.66087	2817.8
UY03R4.7	11.01	0.55	0.4933	0.019	0.40108	2524	23.3	2584.9	41	2475.3	41.8	2530.2	22.6	0.11	1.66284	-4.42775	2475.3
UY03R4.8	6.38	0.34	0.376	0.014	0.36987	2029.5	23.4	2057.6	32.8	2001.1	46.7	2036.4	21.8	0.39	0.533566	-2.82345	2001.1
UY03R4.9	13.6	0.68	0.5221	0.019	0.46888	2722.3	23.7	2708.1	40.3	2732.8	38	2721	23.6	0.69	0.307167	0.903835	2732.8
UY03R5.1	4.6	0.23	0.326	0.011	0.41989	1749.3	20.9	1819	26.8	1667	43.7	1768.6	18.9	0.0077	0.318478	-9.11818	1667
UY03R5.2-1	13.6	0.66	0.5371	0.019	0.35197	2722.3	23	2771.3	39.9	2686.1	40.6	2728.8	22.1	0.2	2.25084	-3.17188	2686.1
UY03R5.3-1	17.62	0.86	0.594	0.022	0.35333	2969.2	23.5	3005.6	44.5	2944.7	40.3	2972.8	23	0.39	0.815661	-2.06812	2944.7
UY03R5.3-2	17.5	0.86	0.5891	0.022	0.2724	2962.7	23.7	2985.8	44.7	2947	42.9	2965.8	22.8	0.6	0.938776	-1.31659	2947
UY03R5.4	12.62	0.65	0.5106	0.019	0.47626	2651.7	24.3	2659.2	40.6	2646	39.2	2652.4	24	0.84	0.997636	-0.498866	2646
UY03R5.5	5.31	0.31	0.332	0.015	0.25246	1870.5	25	1848.1	36.3	1895.5	57.8	1864.4	22.9	0.56	0.663492	2.50066	1895.5
UY03R5.6	11.72	0.68	0.505	0.021	0.24851	2582.3	27.2	2635.2	45	2541	52.4	2592.6	25.2	0.26	0.678856	-3.7072	2541
UY03R6.3	7.34	0.38	0.3843	0.014	0.40009	2153.7	23.2	2096.3	32.6	2208.8	43.5	2139.5	22.4	0.069	0.348206	5.09326	2208.8
UY03R6.4	4.806	0.23	0.3214	0.012	0.26551	1785.9	20.1	1796.6	29.3	1773.6	47.8	1788.7	18.4	0.73	0.615602	-1.2968	1773.6
UY03R6.5	3.247	0.16	0.2591	0.0093	0.33291	1468.5	19.2	1485.2	23.8	1444.3	48.1	1474.1	17	0.5	0.190832	-2.83182	1444.3
UY03R7.1	12.9	0.62	0.5081	0.019	0.50388	2672.4	22.7	2648.5	40.6	2690.5	36.1	2671.4	22.8	0.5	0.967347	1.56105	2690.5
UY03R7.2	11.7	0.62	0.493	0.021	0.53774	2580.7	24.8	2583.6	45.4	2578.4	39.3	2580.7	24.8	0.94	0.617021	-0.201675	2578.4
UY03R7.3-1	11.91	0.57	0.5044	0.018	0.57678	2597.4	22.5	2632.7	38.6	2569.9	33.5	2597.4	22.3	0.26	0.778659	-2.44367	2569.9
UY03R7.3-2	11.95	0.66	0.495	0.02	0.5604	2600.5	25.9	2592.3	43.1	2606.9	39	2600.2	26	0.82	1.04364	0.560052	2606.9
UY03R7.4	13.49	0.65	0.5248	0.018	0.41452	2714.6	22.8	2719.5	38.1	2710.9	38.2	2715.2	22.4	0.89	0.672935	-0.317238	2710.9
UY03R7.5	12.71	0.64	0.5186	0.019	0.66303	2658.4	23.8	2693.2	40.4	2632	31.6	2655.6	23.5	0.25	1.35981	-2.32523	2632
UY03R7.7	4.67	0.25	0.3184	0.013	0.071565	1761.9	22.4	1781.9	31.8	1738.2	59.6	1768.2	18.8	0.59	0.720243	-2.5141	1738.2
UY03R8.1	13.59	0.67	0.5304	0.02	0.19211	2721.6	23.4	2743.1	42.1	2705.6	46.3	2725.5	21.8	0.63	0.699924	-1.38601	2705.6
UY03R8.3	11.71	0.56	0.4899	0.018	0.29668	2581.5	22.4	2570.2	39	2590.3	42.6	2579.7	21.6	0.77	0.743448	0.775972	2590.3
UY03R8.4	13.42	0.68	0.528	0.02	0.46141	2709.7	24	2733	42.2	2692.3	39.2	2711.4	23.7	0.54	0.71381	-1.51172	2692.3
UY03R9.1	4.62	0.24	0.3131	0.012	0.31622	1752.9	21.7	1755.9	29.5	1749.2	49.4	1753.8	19.8	0.92	0.7667	-0.383032	1749.2
UY03R9.2	12.34	0.67	0.488	0.02	0.32403	2630.6	25.6	2562	43.3	2683.8	46.8	2619	25	0.11	0.967404	4.53834	2683.8
UY03R9.3	9.42	0.49	0.4506	0.017	0.53105	2379.8	23.9	2397.9	37.8	2364.3	38.7	2381.3	23.6	0.57	0.79187	-1.42114	2364.3
UY3R1.1	14.33	0.27	0.5341	0.0075	0.39047	2771.8	9.14	2758.7	15.8	2781.4	15.6	2770.29	8.96	0.38	0.851246	0.816136	2781.4
UY3R1.2	13.62	0.28	0.5209	0.0087	0.44336	2723.65	9.9	2703	18.5	2739	16.7	2722.49	9.87	0.22	0.986425	1.31435	2739
UY3R1.3	1.706	0.075	0.1661	0.0048	0.2937	1010.8	14.1	990.6	13.3	1054.8	45.3	999.7	11.1	0.22	0.940683	6.08646	990.6
UY3R1.4	4.564	0.092	0.31	0.0046	0.44141	1742.72	8.48	1740.7	11.4	1745.1	17.7	1742.22	8.02	0.85	0.567908	0.252135	1745.1
UY3R2.2-1	6.45	0.31	0.3652	0.009	0.11051	2039.1	21.2	2006.8	21.3	2072	45.5	2022.8	16	0.26	0.651835	3.14672	2072
UY3R2.2-2	7.19	0.21	0.3866	0.0065	0.43332	2135.3	13.1	2107	15.2	2162.5	23.4	2124.5	11.9	0.063	0.745146	2.56647	2162.5
UY3R2.3-1	2.897	0.092	0.2363	0.0037	0.25865	1381.1	12	1367.43	9.67	1402.4	30.4	1372.26	8.46	0.31	0.57645	2.49358	1402.4
UY3R2.3-2	2.93	0.06	0.2383	0.0031	0.19665	1389.69	7.81	1377.85	8.1	1407.9	21.2	1384.03	6.17	0.24	0.444199	2.13438	1407.9
UY3R2.4	15.24	0.35	0.547	0.009	0.24411	2830.4	11.1	2812.7	18.8	2843	20.5	2827	10.5	0.36	0.577165	1.06578	2843
UY3R2.5	1.751	0.045	0.171	0.0025	0.54638	1027.53	8.33	1017.62	6.9	1048.7	21.8	1020.52	6.57	0.18	0.298062	2.96367	1017.62
UY3R2.8	7.5	0.16	0.3847	0.0054	0.27899	2172.99	9.67	2098.2	12.6	2244.4	19.3	2148.03	8.83	4.2e-08	0.651399	6.51399	2244.4
UY3R3.3	1.811	0.058	0.1788	0.0027	0.56549	1049.4	10.5	1060.42	7.4	1026.7	27	1058.8	7.27	0.21	0.793946	-3.28431	1060.42
UY3R3.4	5.75	0.17	0.3499	0.0056	0.60959	1938.9	12.9	1934.1	13.4	1944	21.2	1936.8	11.8	0.68	0.377169	0.509259	1944
UY3R3.5	4.149	0.11	0.2876	0.0043	0.20785	1664	10.9	1629.5	10.8	1707.8	25.6	1646.25	8.53	0.012	0.786756	4.58485	1707.8
UY3R3.6	13.59	0.26	0.5229	0.0068	0.41406	2721.57	9.23	2711.5	14.5	2729.1	15.3	2720	8.97	0.46	0.534557	0.644901	2729.1
UY3R3.7	16.29	0.74	0.562	0.018	0.18765	2894	21.8	2874.9	37.2	2907.3	41	2890	20.3	0.63	0.3625	1.11444	2907.3
UY3R4.5	5.662	0.13	0.3498	0.006	0.65765	1925.59	9.99	1933.6	14.4	1916.9	15.9	1925.91	9.95	0.46	0.318067	-0.871198	1916.9
UY3R4.6	14.75	0.31	0.5435	0.0088	0.35843	2799.2	10.2	2798.1	18.4	2800.1	17.9	2799.12	9.95	0.95	1.11033	0.071426	2800.1
UY3R4.7	3.364	0.1	0.2611	0.0042	0.27685	1496.1	11.7	1495.5	10.8	1496.9	28.2	1495.73	8.93	0.97	0.570439	0.0935266	1496.9
UY3R5.7-1	15.03	0.33	0.5391	0.0083	0.5214	2817.1	10.6	2779.7	17.4	2844.1	16	2814.5	10.6	0.013	0.707171	2.26434	2844.1
UY3R5.7-2	15.48	0.36	0.5467	0.0072	0.32663	2845.3	11.3	2811.4	15.1	2869.3	18.8	2835.3	10.4	0.031	0.444741	2.01791	2869.3
UY3R5.8	11.43	0.3	0.4715	0.0084	0.33965	2558.9	12.4	2490.1	18.4	2613.8	22.1	2543	11.9	0.00019	0.446717	4.73257	2613.8
UY3R7.1	3.444	0.064	0.2626	0.0035	0.22163	1514.5	7.38	1503.13	8.97	1530.4	19.3	1510.22	6.3	0.27	0.518481	1.78189	1530.4
UY3R7.2	4.468	0.11	0.3107	0.0056	0.59678	1725	10.3	1744.2	13.8	1701.9	18.7	1728	10	0.092	0.538983	-2.48546	1701.9
UY3R7.3	3.173	0.075	0.2494	0.0042	0.23981	1450.61	9.18	1435.4	10.9	1473	24.4	1444.64	7.82	0.22	0.68	2.55261	1473
UY3R7.4	4.489	0.094	0.306	0.005	0.55703	1728.94	8.77	1721	12.4	1738.6	16.8	1727.77	8.64	0.45	0.556086	1.01231	1738.6
UY3R8.1	3.797	0.09	0.2704	0.0049	0.4253	1592.11	9.59	1542.8	12.5	1658	21.4	1577.72	9.12	4.7e-05	0.984931	6.94813	1658
UY3R8.2	1.977	0.055	0.1873	0.0033	0.51486	1107.7	9.41	1106.73	8.98	1109.6	24.2	1107.17	7.99	0.92	0.963196	0.258652	1106.73
UY3R8.3	4.128	0.11	0.2899	0.0059	0.39215	1659.9	10.9	1641	14.8	1683.8	24.6	1654.8	10.3	0.2	0.738848	2.54187	1683.8
UY3R8.4	2.535	0.085	0.2165	0.0053	0.32	1282.1	12.2	1263.4	14.1	1313.8	33.7	1274.6	10.7	0.22	0.761349	3.8362	1313.8
UY3R8.5	4.043	0.088	0.2895	0.0047	0.48253	1642.89	8.93	1639	11.8	1647.8	18.7	1641.95	8.52	0.72	0.556018	0.534045	1647.8
UY3R8.6	5.148	0.12	0.3258	0.0052	0.3941	1844.06	9.99	1818	12.7	1873.6	20.5	1835.89	9.26	0.04	0.943005	2.96755	1873.6
UY3R9.1	12.71	0.52	0.501	0.013	0.49276	2658.4	19.3	2618.1	28	2689.2	30	2651.2	19.1	0.11	0.741983	2.64391	2689.2
UY3R9.2	4	0.092	0.2842	0.0043	0.085239	1634.2	9.41	1612.5	10.8	1662.3	24.6	1624.94	7.44	0.11	0.537135	2.99585	1662.3
UY3R9.3	13.07	0.31	0.5091	0.0087	0.59587	2684.7	11.3	2652.8	18.6	2708.9	16.3	2684.4	11.4	0.034	1.07787	2.07095	2708.9
UY3R9.4	14.21	0.33	0.5141	0.0089	0.31672	2763.8	11.2	2674.1	19	2830	20	2748.6	11	1.7e-06	0.611111	5.50883	2830
UY3R9.5	5.46	0.13	0.3381	0.0053	0.20197	1894.3	10.3	1877.5	12.8	1912.8	23.3	1888.16	8.81	0.25	0.353911	1.84546	1912.8
UY3R9.6	14.47	0.31	0.5382	0.0087	0.22037	2781	10.3	2775.9	18.3	2784.8	19.8	2780.13	9.75	0.79	0.584814	0.319592	2784.8
UY3R10.1	4.608	0.1	0.3133	0.0055	0.48127	1750.72	9.13	1756.9	13.5	1743.3	18.8	1751.69	8.89	0.61	0.37216	-0.78013	1743.3
UY3R10.3	4.789	0.12	0.3136	0.0051	0.32705	1783	10.6	1758.4	12.5	1811.9	22.9	1773.63	9.37	0.07	0.269517	2.9527	1811.9
UY3R10.4	3.14	0.12	0.2393	0.0081	0.80974	1442.6	14.7	1383.1	21.1	1531.4	21.5	1455.6	14.8	2.2e-06	1.09935	9.68395	1531.4
UY3R10.5	15.89	0.36	0.547	0.0099	0.4424	2870.2	11	2812.7	20.7	2910.8	18.1	2866.9	11	0.0021	1.21844	3.37021	2910.8
UY3R10.6	1.801	0.061	0.1717	0.0036	0.18689	1045.8	11.1	1021.47	9.92	1097	36.5	1031.82	8.11	0.071	0.37451	6.88514	1021.47
UY3R12.1	4.975	0.11	0.3233	0.0051	0.31177	1815.08	9.43	1805.8	12.5	1825.7	20.9	1812.27	8.55	0.48	0.423489	1.08999	1825.7
UY3R12.2	3.349	0.068	0.2604	0.0037	0.32018	1492.56	8	1491.89	9.5	1493.5	19.8	1492.31	7	0.95	0.371443	0.1078	1493.5
UY3R13.1	13.8	0.32	0.511	0.0085	0.44637	2736.1	11.1	2660.9	18.2	2792	18.1	2726.6	11.1	5.8e-06	0.525597	4.69556	2792
UY3R13.2	13.95	0.26	0.5204	0.0089	0.37983	2746.32	9.02	2700.9	18.9	2779.9	16.7	2744.04	9.01	0.01	0.620811	2.84183	2779.9
UY3R13.4-1	1.814	0.057	0.1738	0.0026	0.11329	1050.5	10.3	1033.01	7.16	1087.1	33.4	1038.26	6.21	0.14	0.397497	4.97562	1033.01
UY3R13.4-2	1.743	0.039	0.1688	0.0029	0.40221	1024.57	7.25	1005.5	8.02	1065.6	22.3	1016.53	6.4	0.023	0.328814	5.64002	1005.5
UY3R14.1-1	1.825	0.044	0.1766	0.0026	0.38488	1054.48	7.94	1048.37	7.14	1067.2	23.2	1050.9	6.25	0.47	0.390547	1.76443	1048.37
UY3R14.1-2	1.905	0.042	0.1794	0.003	0.34906	1082.84	7.38	1063.7	8.22	1121.6	22.6	1074.77	6.41	0.032	0.409355	5.16227	1063.7
UY3R14.2	13.75	0.62	0.521	0.015	0.5769	2732.6	21.4	2703.4	31.8	2754.3	30.5	2729.8	21.5	0.26	0.573539	1.84802	2754.3
UY3R14.3	14.04	0.33	0.5282	0.0083	0.20346	2752.4	11.3	2733.9	17.6	2766	21.2	2747.9	10.3	0.33	0.61183	1.16052	2766
UY3R14.4	13.29	0.31	0.5104	0.0092	0.54095	2700.5	11.2	2658.3	19.7	2732.2	17.1	2699.7	11.2	0.011	0.815713	2.70478	2732.2
UY3R14.5	3.955	0.11	0.2766	0.006	0.17403	1625	11.3	1574.2	15.2	1691.4	29.8	1607.89	9.94	0.0033	1.14273	6.92917	1691.4
UY3R14.6	4.59	0.13	0.301	0.0072	0.51929	1747.5	11.9	1696.3	17.9	1809.3	23.7	1740.6	11.9	0.00095	0.94146	6.24551	1809.3
UY3R14.7-1	3.72	0.11	0.274	0.0051	0.52523	1575.7	11.9	1561.1	12.9	1595.3	23.8	1569.6	10.9	0.23	0.888307	2.1438	1595.3
UY3R14.7-2	3.828	0.098	0.2723	0.0044	0.33914	1598.7	10.4	1552.5	11.2	1660.1	23.5	1577.58	8.94	0.00021	0.518608	6.48154	1660.1

## Sheet: UY-12-4
Analysis	207Pb/235U	2SE	206Pb/238U	2SE	ρ	207Pb/235U age (Ma)	2SE	206Pb/238U age (Ma)	2SE	207Pb/206Pb (Ma)	2SE	Concordia age (Ma)	2SE	p-value	Th/U	Disc (%)	Selected age for KDE
UY4R1.1	2.279	0.048	0.1998	0.0029	0.34574	1205.81	7.48	1174.25	7.82	1262.8	20.7	1190.81	6.34	0.00033	0.411009	7.0122	1174.25
UY4R1.2	1.766	0.043	0.1743	0.0025	0.15961	1033.05	7.92	1035.76	6.88	1027.3	26.6	1034.63	5.58	0.78	0.0406667	-0.823518	1035.76
UY4R1.3	4.081	0.077	0.2864	0.004	0.38486	1650.51	7.78	1623.5	10.1	1685.1	17.5	1642.39	7.22	0.0076	0.699861	3.65557	1685.1
UY4R1.4-1	1.907	0.067	0.1803	0.0028	0.22718	1083.5	11.7	1068.61	7.67	1113.7	35.1	1072.22	7.05	0.23	0.486517	4.04867	1068.61
UY4R1.4-2	1.898	0.044	0.1827	0.0023	0.53466	1080.39	7.74	1081.71	6.29	1077.7	19.8	1081.33	5.97	0.85	0.510588	-0.372089	1081.71
UY4R1.5	14.48	0.32	0.5394	0.0094	0.48316	2781.7	10.7	2780.9	19.7	2782.2	17.1	2781.7	10.6	0.97	0.67916	0.0467256	2782.2
UY4R1.6-1	4.067	0.1	0.2889	0.0057	0.40521	1647.7	10.1	1636	14.3	1662.6	22.9	1645.04	9.61	0.4	1.26445	1.5999	1662.6
UY4R1.6-2	4.01	0.15	0.2927	0.0048	0.13983	1636.2	15.2	1655	12	1612.2	36.1	1648.06	9.98	0.3	0.8	-2.65476	1612.2
UY4R1.7	3.389	0.08	0.2603	0.0037	0.68282	1501.85	9.31	1491.38	9.5	1516.7	16.6	1496.9	8.67	0.17	0.921147	1.66941	1516.7
UY4R1.8	4.036	0.095	0.2849	0.0039	0.53592	1641.48	9.64	1615.99	9.82	1674.3	18.6	1628.97	8.63	0.007	0.983278	3.48265	1674.3
UY4R1.9-1	4.043	0.11	0.2865	0.0056	0.68287	1642.9	11.1	1624	14.1	1667.1	18.6	1639.9	11.1	0.071	1.075	2.58533	1667.1
UY4R1.9-2	4.133	0.098	0.2952	0.0047	0.18811	1660.85	9.76	1667.5	11.7	1652.5	24.2	1663.39	8.14	0.63	0.805769	-0.907716	1652.5
UY4R1.10	3.344	0.11	0.2573	0.0038	0.45311	1491.4	12.9	1476.01	9.77	1513.3	27.8	1479.89	9.3	0.21	0.460059	2.46415	1513.3
UY4R2.1	3.489	0.07	0.2567	0.0038	0.34417	1524.73	7.98	1472.94	9.78	1597.4	19.3	1506.11	7.26	5.2e-07	0.477215	7.79141	1597.4
UY4R2.2-1	1.924	0.068	0.181	0.0029	0.070759	1089.5	11.8	1072.44	7.94	1123.6	37.7	1077.41	6.83	0.22	1.57302	4.55322	1072.44
UY4R2.2-2	1.867	0.059	0.1821	0.0034	0.10527	1069.5	10.5	1078.44	9.29	1051.2	35.3	1074.53	7.28	0.5	1.11276	-2.59132	1078.44
UY4R2.3	6.24	0.14	0.3595	0.0055	0.54502	2010.07	9.91	1979.8	13.1	2041.3	17.1	2003.48	9.71	0.0079	0.237234	3.01279	2041.3
UY4R2.4	4.095	0.092	0.2907	0.0043	0.34309	1653.31	9.24	1645	10.8	1663.8	20.8	1650.13	8.12	0.47	0.706497	1.12994	1663.8
UY4R2.5	4.05	0.14	0.2867	0.0052	0.2794	1644.3	14.1	1625	13.1	1669	31.8	1633.5	10.9	0.24	1.10154	2.63631	1669
UY4R2.6-1	15.53	0.38	0.5487	0.01	0.50568	2848.3	11.8	2819.8	20.9	2868.6	18.1	2847.1	11.9	0.11	0.607754	1.70118	2868.6
UY4R2.6-2	15.6	0.35	0.5653	0.0091	0.5274	2852.6	10.9	2888.5	18.8	2827.4	16.3	2853.8	10.8	0.027	0.538653	-2.161	2827.4
UY4R2.7	3.925	0.085	0.2836	0.0047	0.55996	1618.85	8.83	1609.5	11.8	1631.1	17.4	1617.06	8.64	0.35	1.27469	1.32426	1631.1
UY4R2.9	14.17	0.35	0.5286	0.0084	-0.19853	2761.2	11.9	2735.6	17.8	2779.9	26.4	2752.51	8.96	0.27	1.72978	1.59358	2779.9
UY4R2.10	2.126	0.057	0.1938	0.0029	0.39716	1157.29	9.29	1141.93	7.85	1186.2	24.8	1147.4	7.1	0.11	0.662326	3.73209	1141.93
UY4R3.1	14.04	0.38	0.537	0.013	0.49242	2752.4	13	2770.9	27.3	2738.9	21.6	2752.1	12.9	0.44	1.65272	-1.16835	2738.9
UY4R3.2	13.46	0.27	0.523	0.0067	0.44291	2712.48	9.66	2711.9	14.3	2712.9	15.6	2712.38	9.32	0.96	0.273333	0.0368609	2712.9
UY4R3.3	4.218	0.11	0.2929	0.0047	0.2518	1677.5	10.8	1656	11.8	1704.6	25	1667.93	8.94	0.12	0.789231	2.85111	1704.6
UY4R3.4	4.134	0.083	0.2871	0.0038	0.41508	1661.05	8.29	1627.02	9.56	1704.3	17.6	1647.89	7.51	0.00049	0.426829	4.53441	1704.3
UY4R3.6	1.881	0.082	0.1862	0.0031	0.12483	1074.4	14.5	1100.76	8.44	1021.3	45.3	1094.69	7.61	0.093	0.706082	-7.78028	1100.76
UY4R3.7	15.43	0.32	0.5527	0.0088	0.62396	2842.2	10.1	2836.4	18.3	2846.3	13.9	2842.6	10.1	0.69	0.944513	0.34782	2846.3
UY4R3.10	16.25	0.31	0.5676	0.0086	0.26359	2891.62	9.33	2898	17.8	2887.2	17.4	2892.45	8.98	0.72	0.68	-0.374065	2887.2
UY4R3.11	3.389	0.085	0.2624	0.004	0.39311	1501.85	9.89	1502.1	10.2	1501.5	22.5	1501.97	8.38	0.98	0.525377	-0.03996	1501.5

## Sheet: UY-12-5
Analysis	207Pb/235U	2SE	206Pb/238U	2SE	ρ	207Pb/235U age (Ma)	2SE	206Pb/238U age (Ma)	2SE	207Pb/206Pb (Ma)	2SE	Concordia age (Ma)	2SE	p-value	Th/U	Disc (%)	Selected age for KDE
UY05R1.1	10.31	0.53	0.4633	0.017	0.21945	2463	23.8	2454.1	37.5	2470.3	47.6	2460.9	22	0.82	0.65302	0.655791	2470.3
UY05R1.2	13.3	0.67	0.5285	0.02	0.56182	2701.2	23.9	2735.1	42.2	2675.9	35.5	2701.2	23.7	0.33	1.02562	-2.21234	2675.9
UY05R1.3	5.219	0.25	0.3308	0.012	0.36735	1855.7	20.4	1842.3	29.1	1870.8	43.7	1852.4	19.3	0.64	0.347782	1.52341	1870.8
UY05R1.4	20.64	0.96	0.6344	0.023	0.24492	3121.8	22.6	3167	45.4	3092.9	41.2	3127.3	21.7	0.32	1.16431	-2.39581	3092.9
UY05R1.5	13.57	0.67	0.5224	0.02	0.41154	2720.2	23.4	2709.4	42.4	2728.2	40	2719.2	23.2	0.78	1.36598	0.689099	2728.2
UY05R1.6	3.418	0.17	0.2718	0.01	0.25943	1508.5	19.6	1549.9	25.4	1450.9	51.1	1521.8	17	0.14	0.426047	-6.82335	1450.9
UY05R1.7	11.14	0.55	0.4848	0.018	0.26013	2534.9	23.1	2548.1	39.1	2524.3	45	2537.3	21.8	0.74	1.83191	-0.942836	2524.3
UY05R1.8	1.891	0.099	0.1853	0.0069	0.36397	1077.9	17.4	1095.9	18.8	1041.9	52.6	1085.7	14.8	0.38	0.511335	-5.18284	1095.9
UY05R1.9-1	13.93	0.71	0.545	0.021	0.36622	2745	24.2	2804.3	43.8	2701.6	42.6	2751.4	23.5	0.16	1.268	-3.80145	2701.6
UY05R1.9-2	14.27	0.7	0.547	0.02	0.20118	2767.8	23.3	2812.7	41.7	2735.3	45.4	2775.9	21.7	0.3	0.993195	-2.82967	2735.3
UY05R1.10	12.71	0.64	0.509	0.02	0.51133	2658.4	23.8	2652.4	42.7	2663	37.7	2658.2	23.8	0.87	0.368175	0.398047	2663
UY05R1.11	10.51	0.63	0.463	0.018	0.65911	2480.8	27.8	2452.8	39.7	2503.8	38.1	2479.2	28.1	0.35	0.518905	2.0369	2503.8
UY05R2.1	13.44	0.74	0.5075	0.019	0.61734	2711.1	26.1	2645.9	40.6	2760	35.8	2709	26.6	0.041	0.444861	4.13406	2760
UY05R2.2	12.8	0.62	0.5067	0.018	0.37885	2665	22.9	2642.5	38.5	2682.2	39.8	2661.8	22.4	0.54	0.355649	1.48013	2682.2
UY05R2.3	18.92	0.92	0.6009	0.022	0.54545	3037.7	23.5	3033.5	44.3	3040.6	33.8	3037.8	23.6	0.91	0.684524	0.233507	3040.6
UY05R2.4-1	15.57	0.8	0.5564	0.021	0.32017	2850.8	24.6	2851.7	43.5	2850.1	43.4	2850.9	23.8	0.98	0.466939	-0.0561384	2850.1
UY05R2.6	13.77	0.67	0.5152	0.019	0.55386	2734	23.1	2678.8	40.4	2775.1	34.4	2733	23.4	0.1	0.780726	3.47015	2775.1
UY05R2.7	17.68	0.88	0.5581	0.021	0.52311	2972.5	24	2858.8	43.5	3050.4	35.4	2969.1	24.5	0.002	0.681159	6.28114	3050.4
UY05R2.8-1	13.09	0.65	0.4946	0.018	0.32782	2686.2	23.5	2590.5	38.8	2758.9	42	2668.6	23.1	0.012	1.95082	6.10388	2758.9
UY05R2.8-2	13.09	0.64	0.488	0.018	0.51165	2686.2	23.1	2562	39	2781	35.9	2676.6	23.8	0.00021	1.88187	7.87487	2781
UY05R2.9	12.37	0.64	0.4693	0.017	0.22718	2632.9	24.4	2480.5	37.3	2752.2	46.1	2591.9	23.4	0.00012	1.07843	9.8721	2752.2
UY05R2.11	6.38	0.35	0.3507	0.013	0.39447	2029.5	24.1	1937.9	31	2124	46.3	1999.9	23.1	0.0031	0.48191	8.76177	2124
UY05R3.6	14.02	0.71	0.514	0.02	0.63853	2751.1	24.1	2673.7	42.6	2808.3	32.5	2756.2	24.3	0.018	2.31353	4.79294	2808.3
UY05R3.7	12.97	0.63	0.5122	0.019	0.53235	2677.5	23	2666	40.5	2686.1	35.4	2677.2	23	0.74	0.868687	0.748297	2686.1
UY05R3.8	15.01	0.79	0.557	0.023	0.31308	2815.9	25.1	2854.2	47.6	2788.5	45.8	2820.3	24.3	0.41	0.660405	-2.35611	2788.5
UY05R3.9	1.839	0.1	0.1786	0.0067	0.52884	1059.5	17.9	1059.3	18.3	1059.9	47.3	1059.4	15.8	0.99	0.277389	0.0566091	1059.3
UY05R4.1-1	1.997	0.11	0.1876	0.0071	0.23164	1114.5	18.6	1108.4	19.3	1126.5	59	1111.6	14.9	0.79	0.326403	1.60675	1108.4
UY05R4.1-2	2.019	0.098	0.1887	0.0067	0.25062	1121.9	16.5	1114.3	18.2	1136.7	52.3	1118.6	13.7	0.72	0.247848	1.97062	1114.3
UY05R4.2	15.39	0.73	0.5659	0.021	0.29546	2839.7	22.7	2891	43.3	2803.5	41.7	2845.8	21.8	0.23	0.440247	-3.1211	2803.5
UY05R4.3	17.34	0.88	0.614	0.026	0.28881	2953.8	24.4	3086	51.9	2865	45.6	2964.6	23.6	0.0096	1.06105	-7.71379	2865
UY05R4.5	16.3	0.77	0.5903	0.021	0.40372	2894.6	22.7	2990.6	42.6	2828.4	37.9	2901.5	22.1	0.015	0.359076	-5.73469	2828.4
UY05R4.6	19.8	0.96	0.5719	0.021	0.41009	3081.6	23.5	2915.6	43.1	3191.7	37.6	3064.8	24.1	2.5e-05	0.587578	8.65056	3191.7
UY05R4.7	15.35	0.81	0.562	0.022	0.3145	2837.2	25.2	2874.9	45.4	2810.6	45	2842.3	24.2	0.4	1.44628	-2.28777	2810.6
UY05R4.8	12.58	0.65	0.529	0.021	0.22974	2648.7	24.4	2737.2	44.3	2581.8	48.1	2662.8	22.7	0.052	0.641775	-6.01906	2581.8
UY05R5.2	10.15	0.56	0.4517	0.018	0.079542	2448.5	25.6	2402.8	40	2486.7	55.2	2435.8	22.6	0.32	0.801508	3.37395	2486.7
UY05R5.3-1	15.72	0.75	0.5555	0.02	0.48256	2859.9	22.9	2848	41.5	2868.3	35.7	2859.4	22.8	0.74	0.250733	0.707736	2868.3
UY05R5.3-2	16.76	0.81	0.604	0.022	0.46817	2921.2	23.2	3045.9	44.2	2836.4	36.8	2924.8	22.8	0.0016	0.33595	-7.38612	2836.4
UY05R5.4	7.39	0.38	0.4028	0.015	0.28902	2159.8	23	2181.9	34.5	2138.8	47.4	2165	21.3	0.53	0.675362	-2.01515	2138.8
UY05R5.5	10.72	0.53	0.4787	0.018	0.33697	2499.2	23	2521.6	39.3	2481	43.2	2502.5	22.1	0.56	0.730072	-1.63644	2481
UY05R5.6	11.6	0.57	0.4908	0.018	0.25919	2572.7	23	2574.1	38.9	2571.5	44.5	2572.9	21.8	0.97	0.346955	-0.101108	2571.5
UY05R5.7	21.95	1.1	0.654	0.024	0.30287	3181.5	24.4	3243.8	46.8	3142.5	41.8	3188.6	23.5	0.18	0.7094	-3.22355	3142.5
UY05R5.8	17.32	0.87	0.607	0.026	0.51753	2952.7	24.2	3058	52.2	2881.8	37.6	2948.7	24	0.02	0.261354	-6.11423	2881.8
UY05R5.9	15.07	0.73	0.5602	0.02	0.3096	2819.7	23.1	2867.5	41.3	2785.7	41.5	2826.3	22.1	0.24	0.843441	-2.93643	2785.7
UY05R5.10	5.46	0.27	0.3597	0.013	0.18473	1894.3	21.3	1980.8	30.8	1800.9	50.7	1917.8	18.5	0.011	0.336698	-9.98945	1800.9
UY05R6.3	4.56	0.24	0.3202	0.013	0.6565	1742	21.9	1790.7	31.8	1684	37.2	1743.6	21.5	0.043	0.546512	-6.3361	1684
UY05R6.4	12.48	0.63	0.5221	0.019	0.5204	2641.2	23.8	2708.1	40.3	2590.4	37.1	2644.5	23.4	0.054	1.37794	-4.5437	2590.4
UY05R6.7	12.69	0.63	0.5257	0.02	0.35263	2656.9	23.4	2723.3	42.3	2606.8	42.4	2664.5	22.6	0.1	0.641426	-4.46908	2606.8
UY05R6.8	4.59	0.23	0.3126	0.012	0.39932	1747.5	20.9	1753.5	29.5	1740.2	45.4	1748.9	19.8	0.83	0.0933908	-0.76428	1740.2
UY05R6.9	13.56	0.7	0.528	0.019	0.4203	2719.5	24.5	2733	40.1	2709.4	40.5	2721.3	23.9	0.72	0.930321	-0.871042	2709.4
UY05R6.10	12	0.66	0.514	0.021	0.53597	2604.4	25.8	2673.7	44.7	2551	40.2	2606.3	25.4	0.069	0.9662	-4.80988	2551
UY05R7.2	13.02	0.65	0.514	0.019	0.32563	2681.1	23.6	2673.7	40.5	2686.7	42.7	2679.9	22.8	0.85	0.656627	0.483865	2686.7
UY05R7.3-1	13.93	0.69	0.527	0.02	0.57651	2745	23.5	2728.8	42.2	2756.9	34.3	2745.2	23.6	0.64	1.46316	1.01926	2756.9
UY05R7.3-2	13	0.64	0.522	0.02	0.55565	2679.7	23.3	2707.7	42.4	2658.6	35.3	2679.4	23.2	0.43	1.02254	-1.84684	2658.6
UY05R7.4	21.04	1.1	0.641	0.024	0.42504	3140.4	25.4	3192.9	47.2	3107	39.8	3144	25	0.22	0.652899	-2.76472	3107
UY05R7.5	5.11	0.25	0.3356	0.013	0.17107	1837.8	20.8	1865.5	31.4	1806.5	51.9	1845.1	18.5	0.42	2.10336	-3.26598	1806.5
UY05R7.6	21.67	1.1	0.655	0.025	0.339	3169.1	24.7	3247.7	48.7	3119.6	41.7	3175.9	24	0.093	0.924138	-4.1063	3119.6
UY05R7.7	13.54	0.64	0.5272	0.02	0.46209	2718.1	22.4	2729.6	42.2	2709.5	37.2	2718.6	22.3	0.76	0.869342	-0.741834	2709.5
UY05R7.8	23.17	1.2	0.666	0.026	0.42277	3234.1	25.3	3290.4	50.3	3199.4	39.7	3236.6	25	0.22	0.231118	-2.84428	3199.4
UY05R7.9	15.1	0.76	0.5458	0.021	0.39612	2821.6	24	2807.7	43.8	2831.5	40.8	2820.2	23.8	0.73	0.608529	0.840544	2831.5
UY05R7.11	3.91	0.21	0.2835	0.011	0.53683	1615.8	21.7	1609	27.6	1624.6	43.2	1614	20.9	0.78	0.587219	0.960236	1624.6
UY5R1.2	4.3	0.12	0.3035	0.0055	0.41125	1693.4	11.6	1708.6	13.6	1674.5	24.5	1698.8	10.3	0.27	0.755147	-2.03643	1674.5
UY5R1.3	15.18	0.34	0.551	0.0083	0.697	2826.6	10.8	2829.3	17.3	2824.7	13.6	2826.3	10.8	0.83	0.590768	-0.162849	2824.7
UY5R1.4	15.87	0.32	0.5635	0.0081	0.34833	2869	9.83	2881.1	16.8	2860.5	16.9	2870.69	9.48	0.46	0.555942	-0.720154	2860.5
UY5R1.5	13.1	0.28	0.5093	0.0075	0.45125	2686.9	10.2	2653.6	16.1	2712	16.6	2682.2	10.1	0.024	1.05362	2.15339	2712
UY5R1.7	2.721	0.07	0.2297	0.0032	0.10345	1334.21	9.59	1332.93	8.42	1336.3	27.2	1333.47	6.64	0.92	0.456654	0.252189	1336.3
UY5R1.8	5.353	0.11	0.3349	0.0054	0.57296	1877.37	8.88	1862.1	13.1	1894.3	15.9	1875.8	8.84	0.16	1.44043	1.69984	1894.3
UY5R1.9	12.96	0.25	0.5126	0.007	0.49074	2676.75	9.27	2667.7	15	2683.6	14.7	2675.89	9.17	0.5	0.852859	0.592488	2683.6
UY5R1.10	15.92	0.35	0.5558	0.0091	0.35749	2872	10.7	2849.2	18.9	2888	18.4	2869.2	10.5	0.21	0.385714	1.34349	2888
UY5R2.3	5.483	0.12	0.3413	0.0047	0.37434	1897.94	9.49	1892.9	11.3	1903.4	19.1	1896.14	8.49	0.67	0.459512	0.551644	1903.4
UY5R2.4	13.21	0.32	0.5166	0.0087	0.5055	2694.8	11.6	2684.7	18.5	2702.3	18	2693.8	11.5	0.54	0.971698	0.651297	2702.3
UY5R2.6	9.77	0.22	0.446	0.0064	0.36562	2413.3	10.5	2377.4	14.3	2443.7	18.8	2403.6	9.86	0.013	0.410325	2.7131	2443.7
UY5R2.7	15.44	0.42	0.526	0.012	0.35438	2842.8	13.1	2724.6	25.4	2927.7	23.4	2831.1	13.2	8.4e-07	0.385659	6.93719	2927.7
UY5R2.8	4.09	0.088	0.2931	0.0046	0.52466	1652.31	8.85	1657	11.5	1646.3	17.7	1653.41	8.48	0.65	0.467364	-0.649942	1646.3
UY5R2.9	2.889	0.083	0.2341	0.0042	0.12331	1379	10.9	1356	11	1415	30.7	1367.53	8.26	0.11	0.757205	4.16961	1415
UY5R3.1	15	0.42	0.552	0.012	0.5612	2815.2	13.5	2833.5	25	2802.2	19.9	2814.8	13.4	0.38	0.46266	-1.11698	2802.2
UY5R3.2	13.85	0.35	0.4946	0.011	0.71113	2739.5	12.1	2590.5	23.8	2851.2	15.3	2768.5	11.6	0	0.724818	9.14352	2851.2
UY5R3.3	14.58	0.32	0.5453	0.0084	0.56911	2788.2	10.6	2805.6	17.6	2775.7	15.4	2788.6	10.6	0.24	1.30841	-1.07721	2775.7
UY5R3.7	18.55	0.35	0.592	0.011	0.43752	3018.71	9.32	2997.5	22.3	3032.8	16.3	3019.01	9.33	0.29	0.413992	1.16394	3032.8
UY5R3.8	15.29	0.36	0.5498	0.0082	0.26203	2833.5	11.4	2824.3	17.1	2840	20.1	2831.3	10.5	0.61	0.940957	0.552817	2840
UY5R3.9	14.45	0.29	0.54	0.0082	0.4168	2779.72	9.72	2783.4	17.2	2777	16.3	2780.06	9.57	0.82	0.689876	-0.230465	2777
UY5R3.10	6.58	0.14	0.3728	0.0061	0.65462	2056.67	9.48	2042.6	14.4	2070.8	14.6	2056.65	9.51	0.2	0.876531	1.36179	2070.8
UY5R4.1	2.175	0.051	0.2041	0.0028	0.47203	1173.08	8.19	1197.31	7.52	1128.6	20.9	1186.82	6.63	0.0028	0.579149	-6.08807	1197.31
UY5R4.3	0.596	0.019	0.0757	0.0014	0.30609	474.69	6.05	470.41	4.2	495.5	34.9	471.49	3.9	0.49	0.352313	5.06357	470.41
UY5R4.4	13.26	0.3	0.5034	0.0074	0.48809	2698.3	10.8	2628.4	15.9	2751.2	16.9	2686.5	10.8	1e-06	0.822911	4.46351	2751.2
UY5R4.5	10.02	0.29	0.4654	0.0091	0.49578	2436.6	13.5	2463.4	20.1	2414.4	22	2440.4	13.1	0.13	1.03903	-2.02949	2414.4
UY5R4.6	4.219	0.1	0.3013	0.0045	0.41123	1677.72	9.79	1697.8	11.2	1652.8	20.8	1685.32	8.64	0.081	0.850117	-2.72265	1652.8
UY5R4.7	13.78	0.29	0.5236	0.0098	0.40665	2734.7	10.1	2714.4	20.8	2749.7	18.2	2733.8	10.1	0.29	0.415196	1.28378	2749.7
UY5R4.8	1.97	0.045	0.1857	0.0026	0.41359	1105.31	7.73	1098.04	7.09	1119.6	21.4	1101.13	6.22	0.37	0.749327	1.92569	1098.04
UY5R4.9	3.321	0.088	0.2618	0.004	0.34038	1486	10.4	1499	10.2	1467.4	24.5	1492.58	8.39	0.27	0.561585	-2.15347	1467.4
UY5R4.10	15.77	0.37	0.563	0.012	0.43978	2863	11.4	2879	24.8	2851.7	19.7	2863.1	11.3	0.47	0.590541	-0.957324	2851.7
UY5R5.3	11.11	0.29	0.4752	0.0085	0.73049	2532.4	12.3	2506.3	18.6	2553.4	15.3	2535.1	12.3	0.044	1.37041	1.8446	2553.4
UY5R5.4	4.81	0.096	0.3193	0.0047	0.68074	1786.65	8.48	1786.3	11.5	1787	13.7	1786.63	8.45	0.97	0.432713	0.0391718	1787
UY5R5.5	10.47	0.22	0.4587	0.0066	0.15105	2477.27	9.88	2433.8	14.6	2513.1	20.1	2464.93	8.82	0.0081	1.13292	3.15547	2513.1
UY5R5.6	17.48	0.38	0.5746	0.0084	0.42825	2961.6	10.6	2926.7	17.3	2985.3	16.8	2956.9	10.5	0.029	0.527721	1.96295	2985.3
UY5R5.7	13.65	0.32	0.5174	0.007	0.20261	2725.7	11.2	2688.1	14.9	2753.7	20.5	2713.32	9.9	0.025	0.382495	2.38225	2753.7
UY5R5.8	2.725	0.096	0.2291	0.0044	0.3235	1335.3	13.1	1329.8	11.6	1344.2	33.2	1332.02	9.97	0.7	0.509235	1.07127	1344.2
UY5R5.9-1	5.5	0.19	0.3445	0.0078	0.46002	1900.6	14.9	1908.3	18.7	1892.2	28.4	1902.8	13.9	0.67	1.0127	-0.850861	1892.2
UY5R5.9-2	5.043	0.12	0.3325	0.006	0.36836	1826.6	10.2	1850.5	14.5	1799.4	22	1832.05	9.49	0.097	1.02078	-2.83984	1799.4
UY5R5.10	5.39	0.14	0.3398	0.0057	0.17696	1883.3	11.2	1885.7	13.7	1880.6	25.7	1884.18	9.38	0.88	1.04626	-0.27119	1880.6
UY5R6.3	14.31	0.3	0.5351	0.0088	0.41132	2770.5	10.1	2762.9	18.5	2776	17.3	2769.9	10	0.66	0.956199	0.471902	2776
UY5R6.4	13.79	0.28	0.5249	0.0074	0.56741	2735.39	9.79	2719.9	15.7	2746.8	14.3	2734.71	9.79	0.24	1.21187	0.979321	2746.8
UY5R6.5	13.02	0.28	0.5219	0.0088	0.5694	2681.1	10.3	2707.2	18.7	2661.5	15.5	2680.5	10.3	0.092	1.40696	-1.71708	2661.5
UY5R6.6	4.2	0.15	0.3014	0.005	0.1075	1674	14.7	1698.2	12.4	1643.8	35.1	1688.23	9.89	0.18	0.730994	-3.30941	1643.8
UY5R6.7	4.855	0.098	0.3239	0.0044	0.15885	1794.48	8.58	1808.7	10.8	1777.9	20.7	1799.65	7.17	0.26	0.313213	-1.73238	1777.9
UY5R6.8	1.87	0.052	0.1821	0.0029	0.243	1070.53	9.23	1078.44	7.93	1054.5	28.8	1075.24	6.67	0.46	0.567262	-2.27027	1078.44
UY5R6.9	4.72	0.34	0.3186	0.0073	-0.11688	1770.8	30.2	1782.9	17.9	1756.6	71.5	1779.5	14.5	0.74	0.0160507	-1.49721	1756.6
UY5R7.2	13.76	0.33	0.5249	0.0076	0.47077	2733.3	11.5	2719.9	16.1	2743.2	17.9	2730.6	11.1	0.37	0.808092	0.849373	2743.2
UY5R7.3	2.137	0.076	0.1982	0.0032	-0.029861	1160.9	12.3	1165.64	8.63	1151.9	39.3	1164.04	6.96	0.75	0.832927	-1.19281	1165.64
UY5R7.4	4.889	0.1	0.3242	0.005	0.48287	1800.36	8.71	1810.2	12.2	1789	17.3	1802.27	8.38	0.38	0.447826	-1.18502	1789
UY5R7.5	5.399	0.12	0.3437	0.0057	0.57484	1884.69	9.61	1904.4	13.7	1863	17	1887.06	9.42	0.084	0.289846	-2.22222	1863
UY5R7.6	14.76	0.31	0.5577	0.0076	0.42678	2799.9	10.2	2857.1	15.8	2758.9	16.4	2808.22	9.73	0.00011	0.719078	-3.55939	2758.9
UY5R7.7	13.48	0.25	0.5214	0.0075	0.3624	2713.88	8.96	2705.1	16	2720.4	15.9	2712.86	8.76	0.57	0.472222	0.562417	2720.4
UY5R7.8	13.64	0.34	0.4919	0.0094	0.61406	2725	11.9	2578.9	20.4	2835.2	16.7	2728	12.2	0	0.482927	9.03993	2835.2
UY5R7.10	1.748	0.053	0.1732	0.003	0.41884	1026.42	9.82	1029.72	8.26	1019.4	28.4	1028.54	7.47	0.74	1.38516	-1.01236	1029.72
UY5R8.5	2.857	0.079	0.2373	0.0034	0.22683	1370.7	10.4	1372.65	8.89	1367.6	27.2	1371.85	7.47	0.87	0.499882	-0.36926	1367.6
UY5R8.7	6.92	0.17	0.3815	0.0053	0.2253	2101.2	11	2083.3	12.4	2118.8	22.4	2093.62	9.15	0.22	0.69596	1.67548	2118.8
UY5R8.8	0.601	0.018	0.0774	0.0015	0.45172	477.87	5.72	480.58	4.49	464.9	30.4	479.79	4.2	0.62	0.417112	-3.37277	480.58
UY5R8.10	13.64	0.32	0.5251	0.0086	0.44622	2725	11.3	2720.8	18.2	2728.2	18.3	2724.5	11	0.8	1.40572	0.271241	2728.2

## Sheet: UY-12-6
Analysis	207Pb/235U	2SE	206Pb/238U	2SE	ρ	207Pb/235U age (Ma)	2SE	206Pb/238U age (Ma)	2SE	207Pb/206Pb (Ma)	2SE	Concordia age (Ma)	2SE	p-value	Th/U	Disc (%)	Selected age for KDE
UY06R1.3	1.656	0.094	0.1684	0.0062	0.29061	991.8	18	1003.3	17.1	966.6	59.2	997.9	14	0.58	1.31519	-3.79681	1003.3
UY06R2.1	6.03	0.3	0.369	0.014	0.37831	1980.2	21.7	2024.7	33	1934	44.7	1988.6	20.5	0.16	1.30222	-4.68976	1934
UY06R2.2	1.873	0.11	0.1799	0.0074	0.3675	1071.6	19.5	1066.4	20.2	1082.1	58.2	1069.2	16.4	0.82	0.602261	1.45088	1066.4
UY06R2.3	2.034	0.1	0.1912	0.0069	0.32979	1127	16.8	1127.9	18.7	1125.2	50.4	1127.3	14.4	0.96	0.86632	-0.239957	1127.9
UY06R3.1	13.35	0.68	0.523	0.02	0.47168	2704.7	24.1	2711.9	42.4	2699.4	39	2705.2	23.9	0.85	1.11547	-0.463066	2699.4
UY06R3.2	5.19	0.26	0.3369	0.012	0.35972	1851	21.4	1871.7	28.9	1827.7	45.4	1856.6	19.7	0.48	1.49716	-2.4074	1827.7
UY06R3.3	4.134	0.2	0.2983	0.011	0.45676	1661	19.8	1682.9	27.3	1633.6	42.4	1665.8	18.8	0.39	0.719265	-3.01787	1633.6
UY06R3.4	1.834	0.09	0.183	0.0063	0.29634	1057.7	16.1	1083.3	17.2	1005.2	51.7	1069.2	13.3	0.19	0.737747	-7.7696	1083.3
UY06R4.1	4.79	0.25	0.3243	0.012	0.22108	1783.1	22	1810.7	29.2	1751.1	52.2	1791.9	19.1	0.4	0.180303	-3.40357	1751.1
UY06R4.2	11.18	0.54	0.4914	0.018	0.18913	2538.2	22.6	2576.7	38.9	2507.6	46.2	2545.9	20.8	0.35	0.715363	-2.75562	2507.6
UY06R4.4	13.67	0.65	0.542	0.02	0.51268	2727.1	22.6	2791.8	41.8	2679.6	35.5	2728	22.3	0.074	0.601562	-4.18719	2679.6
UY06R4.5	1.788	0.086	0.1731	0.0064	0.54574	1041.1	15.7	1029.2	17.6	1066.2	42	1036.6	14.6	0.46	0.905405	3.47027	1029.2
UY06R5.1	1.893	0.094	0.1857	0.0067	0.27721	1078.6	16.5	1098	18.2	1039.6	53.2	1086.9	13.7	0.35	0.401665	-5.61755	1098
UY06R5.2	5.922	0.28	0.3641	0.013	0.33036	1964.5	20.6	2001.6	30.7	1925.6	43.9	1972.6	19.2	0.23	0.311881	-3.94682	1925.6
UYO6R5.3-1	1.933	0.099	0.1825	0.0068	0.23867	1092.6	17.2	1080.6	18.5	1116.5	55.6	1087.2	14.1	0.59	0.974436	3.21541	1080.6
UY06R5.3-2	1.885	0.089	0.1823	0.0065	0.34585	1075.8	15.7	1079.5	17.7	1068.3	48.6	1077.3	13.6	0.85	0.95106	-1.04839	1079.5
UY06R5.4	1.991	0.098	0.188	0.0066	0.29019	1112.5	16.7	1110.5	17.9	1116.2	51.5	1111.6	13.9	0.93	0.719272	0.510661	1110.5
UY06R5.5	11.81	0.58	0.5005	0.018	0.49397	2589.5	23.1	2615.9	38.7	2568.8	37.2	2591.4	22.7	0.44	0.4811	-1.83354	2568.8
UY06R6.1	5.2	0.26	0.3319	0.013	0.55717	1852.6	21.3	1847.6	31.5	1858.3	39	1852	21.1	0.85	0.333187	0.575795	1858.3
UY06R6.2	1.781	0.09	0.1767	0.0067	0.50685	1038.5	16.4	1048.9	18.4	1016.8	45.9	1042.5	14.9	0.55	0.732225	-3.15696	1048.9
UY06R6.3	2.32	0.19	0.2053	0.011	0.37056	1218.4	29.1	1203.7	29.4	1244.5	77.9	1211.1	24.4	0.65	0.258303	3.27843	1244.5
UY06R7.2	17.96	0.9	0.6029	0.022	0.2874	2987.6	24.2	3041.5	44.3	2951.5	42.8	2995	23.1	0.22	0.883041	-3.0493	2951.5
UY06R7.3	4.05	0.25	0.2943	0.012	0.61194	1644.3	25.2	1663	29.9	1620.5	45.6	1649.5	23.9	0.45	0.860455	-2.62265	1620.5
UY06R7.4	4.941	0.24	0.3274	0.013	0.5609	1809.3	20.5	1825.8	31.6	1790.4	38.4	1810.6	20.3	0.53	0.257059	-1.97721	1790.4
UY06R7.5	14.42	0.74	0.547	0.022	0.39243	2777.7	24.4	2812.7	45.9	2752.5	42.3	2780.6	24	0.41	0.84379	-2.1871	2752.5
UY06R8.1	1.857	0.094	0.1831	0.0072	0.41446	1065.9	16.7	1083.9	19.6	1029.3	50.2	1072.4	15	0.36	0.0947448	-5.30458	1083.9
UY06R8.2	5.267	0.25	0.3433	0.013	0.50393	1863.5	20.3	1902.5	31.2	1820.3	39.4	1868.1	19.8	0.16	0.440131	-4.51574	1820.3
UY06R8.3	5.032	0.24	0.3379	0.013	0.57277	1824.7	20.2	1876.6	31.3	1766.1	37.2	1827.9	19.9	0.045	0.373437	-6.25672	1766.1
UY06R8.4	1.926	0.092	0.1878	0.0067	0.43132	1090.2	16	1109.4	18.2	1051.8	46.1	1097.5	14.2	0.29	0.0850913	-5.47633	1109.4
UY06R9.1	4.083	0.21	0.2931	0.011	0.45572	1650.9	21	1657	27.4	1643.2	44.5	1652.5	19.8	0.81	0.339781	-0.839825	1643.2
UY06R9.2-2	14.65	0.71	0.5504	0.021	0.43663	2792.8	23.1	2826.8	43.7	2768.3	38.5	2794.7	22.8	0.39	0.734624	-2.11321	2768.3
UY06R9.3	1.861	0.092	0.1797	0.0066	0.27709	1067.3	16.3	1065.3	18	1071.4	53.1	1066.5	13.7	0.92	1.1083	0.569349	1065.3
UY06R9.4	5.84	0.28	0.3602	0.014	0.65099	1952.4	20.8	1983.1	33.2	1919.9	33.5	1951.5	20.7	0.22	0.457383	-3.29184	1919.9
UY06R9.5	16.89	0.87	0.61	0.023	0.16221	2928.6	24.8	3070	46.1	2832.8	48	2952.3	22.5	0.0038	0.528689	-8.37334	2832.8
UY06R10.1	4.179	0.21	0.3044	0.012	0.68129	1669.9	20.6	1713.1	29.7	1616.1	34.7	1670.4	20.3	0.048	0.697802	-6.0021	1616.1
UY06R10.4	13.83	0.7	0.563	0.022	0.66155	2738.1	24	2879	45.4	2635.8	32	2720.6	23.5	5.9e-05	1.90631	-9.2268	2635.8
UY06R10.6	12.68	0.66	0.542	0.021	0.27972	2656.2	24.6	2791.8	43.9	2554.4	46.6	2675.5	22.9	0.0022	0.691862	-9.29377	2554.4
UY06R11.2	14.87	0.76	0.565	0.023	0.57923	2807	24.4	2887.3	47.4	2749.8	35.6	2802.6	24.1	0.04	0.933993	-5.00036	2749.8
UY06R11.3	14.03	0.69	0.5332	0.02	0.54526	2751.7	23.4	2754.9	42.1	2749.4	35.2	2751.8	23.4	0.93	0.974293	-0.200044	2749.4
UY06R11.4	1.92	0.1	0.1777	0.0066	0.23496	1088.1	17.4	1054.4	18.1	1156.1	56	1071.7	14.1	0.13	0.507555	8.79682	1054.4
UY06R11.5	38.16	1.8	0.756	0.028	0.48488	3724.1	23.5	3629.6	51.4	3775.3	33.3	3725.5	23.7	0.035	0.665263	3.8593	3775.3
UY06R12.1	1.876	0.11	0.1773	0.007	0.53095	1072.7	19.4	1052.2	19.2	1114.4	50.4	1061.9	17.1	0.28	0.32	5.58148	1052.2
UY06R12.2	15.64	0.75	0.5459	0.02	0.46942	2855.1	23	2808.1	41.7	2888.4	36.4	2852.3	23.1	0.2	0.559811	2.78009	2888.4
UY06R12.3	13.85	0.69	0.5001	0.018	0.40037	2739.5	23.7	2614.2	38.7	2833.2	39.6	2719.2	23.9	0.00055	0.957746	7.72978	2833.2
UY06R12.4	5.81	0.28	0.3382	0.013	0.39705	1947.9	20.9	1878	31.3	2023.1	42.9	1933.3	20.5	0.02	0.360933	7.17216	2023.1
UY06R12.5	14.05	0.68	0.5126	0.02	0.57864	2753.1	23	2667.7	42.6	2816.3	33.7	2755.5	23.3	0.014	0.486108	5.27643	2816.3
UY06R13.1	4.46	0.23	0.3002	0.011	0.49138	1723.6	21.4	1692.3	27.3	1761.7	42.4	1714.8	20.6	0.21	0.638929	3.93938	1761.7
UY06R13.3	5.16	0.28	0.3274	0.013	0.43059	1846	23.1	1825.8	31.6	1869	46.7	1841	22.1	0.5	0.44876	2.3114	1869
UY06R13.4	2.068	0.12	0.1914	0.0075	0.40833	1138.3	19.9	1129	20.3	1156.1	54.8	1133.7	16.9	0.67	0.46451	2.34409	1129
UY0613.5	13.54	0.67	0.53	0.02	0.50742	2718.1	23.5	2741.5	42.2	2700.8	36.9	2718.9	23.3	0.52	1.45938	-1.50696	2700.8
UY06R14.1-1	1.811	0.099	0.1794	0.0073	0.13785	1049.4	17.9	1063.7	20	1019.9	64.3	1055.6	14.1	0.57	0.502703	-4.29454	1063.7
UY06R14.1-2	1.765	0.098	0.1787	0.0074	0.4146	1032.7	18	1059.9	20.2	975.6	54.9	1043.3	15.8	0.19	0.298443	-8.64084	1059.9
UY06R14.2	13.72	0.65	0.5418	0.02	0.35891	2730.6	22.5	2791	41.8	2686.2	40.2	2736.6	21.8	0.13	0.960735	-3.90142	2686.2
UY06R14.3-1	11.52	0.58	0.4872	0.019	0.68914	2566.2	23.6	2558.6	41.2	2572.3	30.9	2567.2	23.3	0.8	0.807256	0.532597	2572.3
UY06R14.3-2	11.55	0.63	0.4908	0.019	0.25871	2568.6	25.5	2574.1	41.1	2564.3	48.7	2569.8	23.9	0.9	0.700214	-0.382171	2564.3
UY06R14.4	6.99	0.34	0.3932	0.015	0.52896	2110.2	21.7	2137.7	34.7	2083.5	38	2112.3	21.4	0.36	0.508772	-2.60139	2083.5
UY06R14.5-1	16.62	0.87	0.594	0.023	0.53526	2913.2	25.1	3005.6	46.5	2849.9	37.2	2912.9	24.8	0.02	0.716426	-5.46335	2849.9
UY06R14.5-2	8.63	0.45	0.4127	0.016	0.27842	2299.7	23.8	2227.3	36.5	2364.7	47.6	2282.4	22.6	0.054	0.485111	5.81046	2364.7
